# Supplementary material for: A network meta-analysis on the comparative efficacy of different dietary approaches on glycaemic control in patients with type 2 diabetes mellitus
Source: PubMed Central journal article supplement (PMC5871653; doi:10.1007/s10654-017-0352-x), 2018-01-04
Supplement: 10654_2017_352_MOESM1_ESM.pdf [file 10654_2017_352_MOESM1_ESM.pdf]

## Electronic Supplementary Material

| <b>Content</b>                                                                         | <b>Page</b> |
|----------------------------------------------------------------------------------------|-------------|
| Supplementary Appendix S1: Search Strategy                                             | 2           |
| Supplementary Figure S1: Flow diagram                                                  | 3           |
| Supplementary Table S1: Full-text articles excluded                                    | 4-5         |
| Supplementary Figure S2: Risk of bias                                                  | 6           |
| Supplementary Table S2-3: Study characteristics                                        | 7-29        |
| Supplementary Figure S3-6: Box plots                                                   | 30-32       |
| Supplementary Figure S7-8: Intervalplots                                               | 33-36       |
| Supplementary Figure S9-10: Rankograms                                                 | 37-38       |
| Supplementary Figure S11-12: Loop-specific approach                                    | 39-40       |
| Supplementary Table S4-5: Side-splitting approach                                      | 41-42       |
| Supplementary Table S6-13: Subgroup and sensitivity analysis for network meta-analysis | 43-52       |
| Supplementary Figure S11: Meta-regression                                              | 53          |
| Supplementary Figure S14-15: Comparison-adjusted funnel plot                           | 54-55       |
| Supplementary Figure S16: Bar graphs                                                   | 56          |
| Supplementary Appendix S2: GRADE assessment                                            | 57-58       |
| Supplementary References of excluded studies                                           | 59-62       |

## Electronic Supplementary Material

### Supplementary Appendix S1:

#### **PubMed:**

(diabetes [MeSH Terms])

AND

(low-carbohydrate OR high-carbohydrate OR low-fat OR high-fat OR low-protein OR high-protein  
OR vegetarian OR vegan OR Mediterranean OR DASH OR dietary approaches to stop hypertension  
OR glycaemic index OR glycaemic load OR Palaeolithic OR low-calorie OR atkins)

AND

(glycemic OR glycaemia OR glycaemic OR glycemia OR HbA1c OR A1c OR glycated OR  
glycosylated OR glucose)

AND (random\*)

#### **Cochrane CENTRAL**

(diabetes)

AND

(low-carbohydrate OR high-carbohydrate OR low-fat OR high-fat OR low-protein OR high-protein  
OR vegetarian OR vegan OR Mediterranean OR DASH OR dietary approaches to stop hypertension  
OR glycaemic index OR glycaemic load OR Palaeolithic OR low-calorie OR atkins)

AND

(glycemic OR glycaemia OR glycaemic OR glycemia OR HbA1c OR A1c OR glycated OR  
glycosylated OR glucose)

## Electronic Supplementary Material

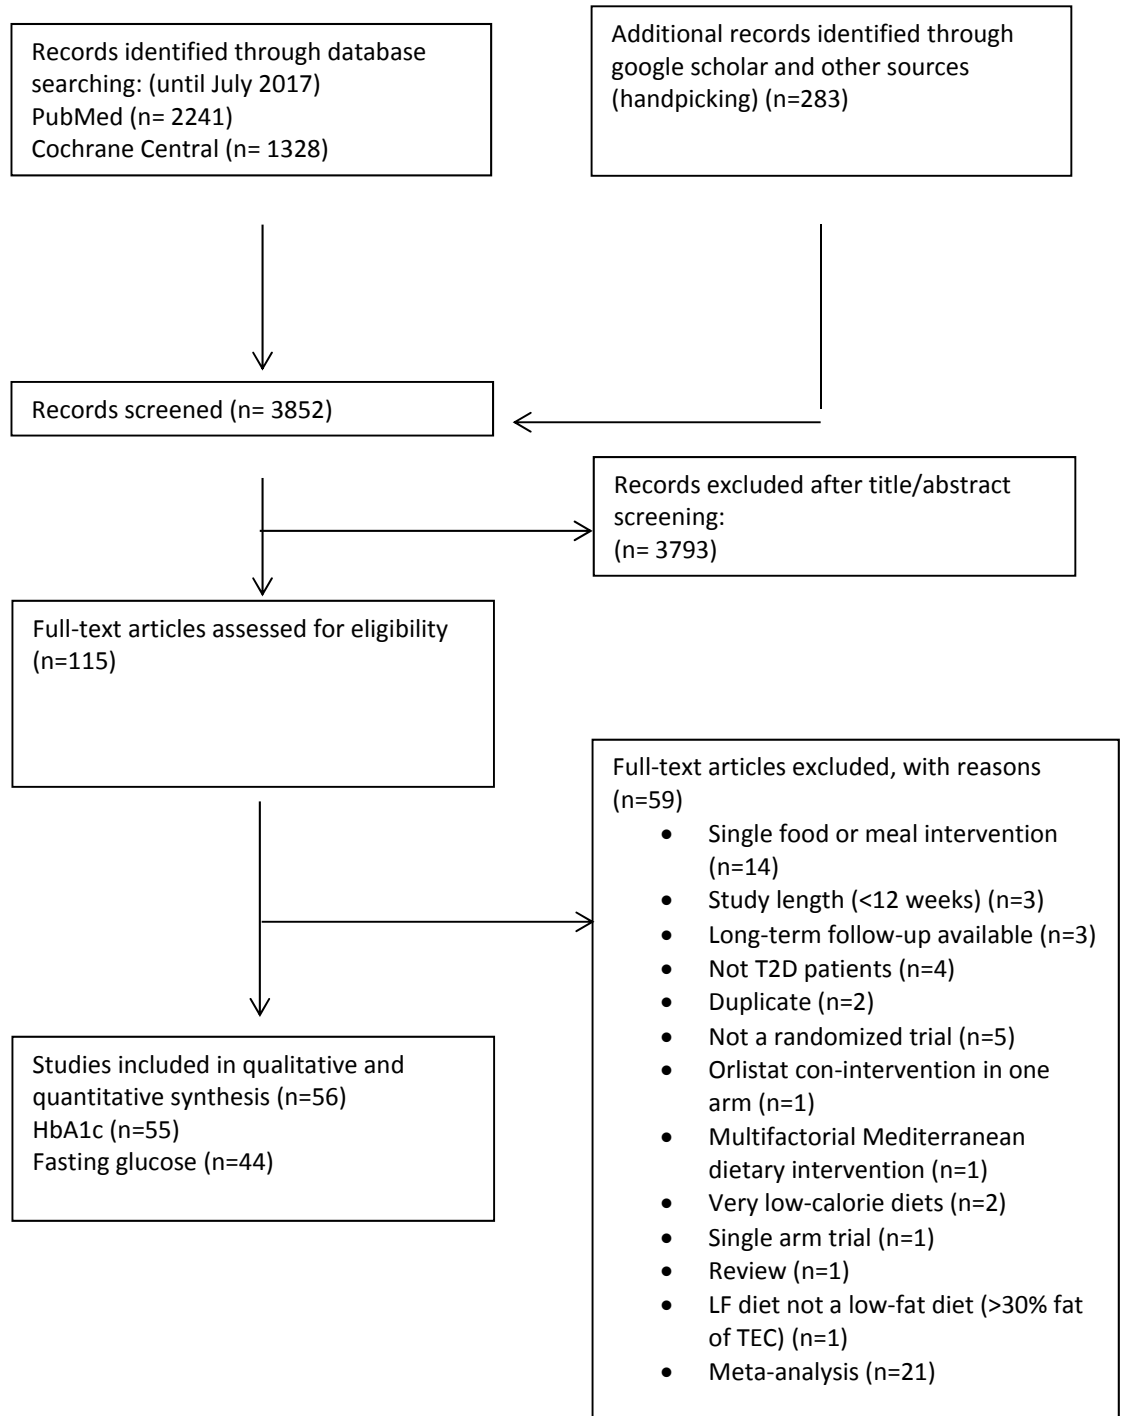

Supplementary Figure S1: Flow diagram of study selection

Electronic Supplementary Material

| Reference | Reason for exclusion                              |
|-----------|---------------------------------------------------|
| [1]       | Single food or meal intervention                  |
| [2]       | Single food or meal intervention                  |
| [3]       | Single food or meal intervention                  |
| [4]       | Study length <12 weeks                            |
| [5]       | Long-term follow-up available                     |
| [6]       | Not T2D patients                                  |
| [7]       | Same study already included                       |
| [8]       | Single food or meal intervention                  |
| [9]       | Not a randomized trial                            |
| [10]      | Study length <12 weeks                            |
| [11]      | Study length <12 weeks                            |
| [12]      | Not a randomized trial                            |
| [13]      | Not a randomized trial                            |
| [14]      | Single food or meal intervention                  |
| [15]      | Not T2D patients                                  |
| [16]      | Single food or meal intervention                  |
| [17]      | Orlistat co-intervention in one group             |
| [18]      | Single food or meal intervention                  |
| [19]      | Single food or meal intervention                  |
| [20]      | Not a randomized trial                            |
| [21]      | Not a randomized trial                            |
| [22]      | Not T2D patients                                  |
| [23]      | Single food or meal intervention                  |
| [24]      | Single food or meal intervention                  |
| [25]      | Long-term follow-up available                     |
| [26]      | Multifactorial Mediterranean dietary intervention |
| [27]      | Single food or meal intervention                  |
| [28]      | Single food or meal intervention                  |
| [29]      | Very low calorie diets                            |
| [30]      | Very low calorie diets                            |
| [31]      | Long-term follow-up available                     |
| [32]      | Single-arm                                        |
| [33]      | Single food or meal intervention                  |
| [34]      | Single food or meal intervention                  |
| [35]      | Not T2D patients                                  |
| [36]      | Same study already included                       |
| [37]      | LF diet not a low-fat diet (>30% fat of TEC)      |
| [38]      | Meta-analysis                                     |
| [39]      | Meta-analysis                                     |
| [40]      | Meta-analysis                                     |
| [41]      | Meta-analysis                                     |
| [42]      | Meta-analysis                                     |
| [43]      | Meta-analysis                                     |
| [44]      | Review                                            |
| [45]      | Meta-analysis                                     |
| [46]      | Meta-analysis                                     |
| [47]      | Meta-analysis                                     |
| [48]      | Meta-analysis                                     |
| [49]      | Meta-analysis                                     |
| [50]      | Meta-analysis                                     |
| [51]      | Meta-analysis                                     |
| [52]      | Meta-analysis                                     |

## Electronic Supplementary Material

|      |               |
|------|---------------|
| [53] | Meta-analysis |
| [54] | Meta-analysis |
| [55] | Meta-analysis |
| [56] | Meta-analysis |
| [57] | Meta-analysis |
| [58] | Meta-analysis |
| [59] | Meta-analysis |

Supplementary Table S1: Full-text articles excluded, with reasons (n=59)

# Electronic Supplementary Material

|                  | Random sequence generation (selection bias) | Allocation concealment (selection bias) | Blinding of participants and personnel (performance bias) | Incomplete outcome data (attrition bias) | Selective reporting (reporting bias) |
|------------------|---------------------------------------------|-----------------------------------------|-----------------------------------------------------------|------------------------------------------|--------------------------------------|
| Andrews 2011     | ●                                           | ●                                       | ●                                                         | ●                                        | ●                                    |
| Barnard 2009     | ●                                           | ?                                       | ●                                                         | ?                                        | ●                                    |
| Brand 1994       | ?                                           | ?                                       | ●                                                         | ●                                        | ●                                    |
| Brehm 2009       | ?                                           | ?                                       | ●                                                         | ●                                        | ●                                    |
| Brinkworth 2004  | ?                                           | ?                                       | ●                                                         | ?                                        | ?                                    |
| Brunerova 2007   | ?                                           | ?                                       | ●                                                         | ?                                        | ●                                    |
| Cerullo 2014     | ●                                           | ?                                       | ●                                                         | ●                                        | ●                                    |
| Coppell 2010     | ●                                           | ?                                       | ●                                                         | ●                                        | ●                                    |
| Daly 2005        | ●                                           | ?                                       | ●                                                         | ?                                        | ●                                    |
| Davis 2009       | ●                                           | ?                                       | ●                                                         | ●                                        | ?                                    |
| de Bont 1981     | ?                                           | ?                                       | ●                                                         | ?                                        | ●                                    |
| Dyson 2007       | ●                                           | ?                                       | ●                                                         | ?                                        | ?                                    |
| Eihayany 2010    | ?                                           | ?                                       | ●                                                         | ?                                        | ●                                    |
| Esposito 2009    | ●                                           | ?                                       | ?                                                         | ●                                        | ●                                    |
| Fabricatore 2011 | ?                                           | ?                                       | ●                                                         | ●                                        | ●                                    |
| Guldbrand 2012   | ●                                           | ●                                       | ●                                                         | ●                                        | ●                                    |
| Heilbronn 1999   | ?                                           | ?                                       | ●                                                         | ●                                        | ●                                    |
| Hockaday 1978    | ?                                           | ?                                       | ●                                                         | ●                                        | ?                                    |
| Huang 2010       | ●                                           | ?                                       | ●                                                         | ●                                        | ●                                    |
| Iqbal 2009       | ●                                           | ?                                       | ●                                                         | ●                                        | ●                                    |
| Itsiopoulos 2011 | ?                                           | ?                                       | ●                                                         | ?                                        | ●                                    |
| Jenkins 2008     | ●                                           | ?                                       | ●                                                         | ●                                        | ●                                    |
| Jenkins 2012     | ●                                           | ?                                       | ●                                                         | ●                                        | ●                                    |
| Jenkins 2014     | ●                                           | ?                                       | ●                                                         | ●                                        | ●                                    |
| Jönsson 2009     | ●                                           | ?                                       | ●                                                         | ●                                        | ●                                    |
| Kahleova 2011    | ?                                           | ?                                       | ●                                                         | ●                                        | ●                                    |
| Kaplan 1987      | ?                                           | ?                                       | ●                                                         | ●                                        | ?                                    |
| Krebs 2012       | ●                                           | ●                                       | ?                                                         | ?                                        | ●                                    |
| Larsen 2011      | ●                                           | ●                                       | ?                                                         | ●                                        | ●                                    |
| Lasa 2014        | ●                                           | ●                                       | ?                                                         | ●                                        | ●                                    |
| Lee 2016         | ●                                           | ?                                       | ●                                                         | ●                                        | ●                                    |
| Li 2016          | ?                                           | ?                                       | ●                                                         | ●                                        | ●                                    |
| Liu 2016         | ?                                           | ?                                       | ●                                                         | ?                                        | ●                                    |
| Luger 2013       | ?                                           | ?                                       | ●                                                         | ●                                        | ●                                    |
| Ma 2008          | ●                                           | ?                                       | ●                                                         | ?                                        | ●                                    |
| McLaughlin 2007  | ?                                           | ?                                       | ●                                                         | ●                                        | ?                                    |
| Milne 1994       | ?                                           | ?                                       | ●                                                         | ?                                        | ?                                    |
| Mishra 2013      | ●                                           | ?                                       | ●                                                         | ●                                        | ●                                    |
| Nicholson 1999   | ?                                           | ?                                       | ●                                                         | ●                                        | ●                                    |
| Parker 2002      | ?                                           | ?                                       | ●                                                         | ●                                        | ●                                    |
| Pedersen 2014    | ●                                           | ●                                       | ●                                                         | ●                                        | ●                                    |
| Pritchard 1999   | ?                                           | ●                                       | ●                                                         | ?                                        | ?                                    |
| Rock 2014        | ●                                           | ?                                       | ●                                                         | ●                                        | ●                                    |
| Saslow 2014      | ●                                           | ●                                       | ●                                                         | ●                                        | ●                                    |
| Sato 2016        | ●                                           | ?                                       | ●                                                         | ?                                        | ?                                    |
| Shai 2008        | ●                                           | ●                                       | ?                                                         | ●                                        | ●                                    |
| Shige 2000       | ?                                           | ?                                       | ●                                                         | ●                                        | ●                                    |
| Stern 2004       | ●                                           | ●                                       | ●                                                         | ?                                        | ●                                    |
| Tay 2015         | ●                                           | ●                                       | ●                                                         | ●                                        | ●                                    |
| Uusitupa 1993    | ?                                           | ?                                       | ●                                                         | ?                                        | ●                                    |
| Walker 1995      | ?                                           | ?                                       | ●                                                         | ?                                        | ●                                    |
| Watson 2016      | ●                                           | ?                                       | ●                                                         | ?                                        | ●                                    |
| Westman 2008     | ●                                           | ?                                       | ●                                                         | ●                                        | ●                                    |
| Wolever 2008     | ●                                           | ●                                       | ●                                                         | ●                                        | ●                                    |
| Wycherley 2010   | ?                                           | ?                                       | ●                                                         | ●                                        | ●                                    |
| Yamada 2014      | ●                                           | ?                                       | ●                                                         | ●                                        | ●                                    |

Supplementary Figure S2: Risk of bias of individual trials

## Electronic Supplementary Material

| Reference       | Country        | Study Design   | Comparison Diets                     | Sample size | Mean age                                     | Mean baseline BMI                            | Mean baseline HbA1c                        | Female (%)                      | Duration, months | Diet 1                                                                                                                                    | Diet 2                                                                                                                                                                        | Diet 3 | Energy restricted                                                       | Drop out                                    |
|-----------------|----------------|----------------|--------------------------------------|-------------|----------------------------------------------|----------------------------------------------|--------------------------------------------|---------------------------------|------------------|-------------------------------------------------------------------------------------------------------------------------------------------|-------------------------------------------------------------------------------------------------------------------------------------------------------------------------------|--------|-------------------------------------------------------------------------|---------------------------------------------|
| Andrews 2016    | United Kingdom | RCT, parallel  | Low-fat vs. Control                  | 347         | Low Fat: 60.1<br>Control: 59.5               | Low Fat: 31.5<br>Control: 32.3               | Low Fat: 6.64<br>Control: 6.72             | Low Fat: 36%<br>Control: 37%    | 12               | Low fat:<br>Based on Diabetes UK dietary guidelines: choose foods in the lower ranges of energy density, fat content, and glycaemic index | Control:<br>Standard dietary and exercise advice after randomization and at the end of the study, with reviews by a study doctor and nurse at baseline and at 6 and 12 months | NA     | Low fat: yes<br>Control: unrestricted                                   | Low fat: 1%<br>Control: 7%                  |
| Barnard 2009    | USA            | RCT, parallel  | Vegetarian vs. Low-fat               | 99          | Vegetarian: 56.7<br>Low-fat: 54.6            | Vegetarian: 33.9<br>Low fat: 35.9            | Vegetarian: 8.0<br>Low fat: 7.9            | Vegetarian: 55%<br>Low fat: 66% | 18               | Vegetarian:<br>75% carbohydrate, 15% protein, 10% fat                                                                                     | Low-fat:<br>American Diabetes Association guidelines: 60-70% carbohydrate, 15-20% protein, <7% saturated fat and MUFA, <200 mg cholesterol                                    | NA     | Vegetarian: unrestricted<br>Low-fat: diet with BMI >25: 500-1000 kcal/d | Vegetarian: 33%;<br>Low fat: 24%            |
| Brand 1994      | Australia      | RCT, crossover | Low glycaemic index/load vs. Low-fat | 16          | 62                                           | 25                                           | 7.7                                        | 38%                             | 3                | Low glycaemic index/load:<br>6% of carbohydrate from legumes, 10% from porridge oats, 21% from pasta                                      | Low-fat:<br>12% of carbohydrate from ready-to-eat breakfast cereals, 8% from potatoes, 8% from bananas                                                                        | NA     | No                                                                      | No                                          |
| Brehm 2009      | USA            | RCT, parallel  | Moderate-carbohydrate vs. Low-fat    | 124         | 56.5                                         | 35.9                                         | 7.3                                        | 64%                             | 12               | Moderate carbohydrate:<br>45% carbohydrate, 15% protein, 40% fat, 20% MUFA                                                                | Low-fat:<br>60% carbohydrate, 15% protein, 25% fat                                                                                                                            | NA     | 200 to 300 kcal/d energy deficit                                        | Moderate carbohydrate: 31%;<br>Low-fat: 16% |
| Brinkworth 2004 | Australia      | RCT, parallel  | High protein vs. Low-fat             | 64          | High protein: 60.9<br>Low-fat: 62.7          | High protein: 33.6<br>Low-fat: 33.3          | High protein: 6.5<br>Low-fat: 6.2          | NA                              | 15               | High protein:<br>40% carbohydrate, 30% protein, 30% fat                                                                                   | Low-fat:<br>55% carbohydrate, 15% protein, 30% fat                                                                                                                            | NA     | No                                                                      | High protein: 39%;<br>Low-fat: 42%          |
| Brunerova 2007  | Czech Republic | RCT, parallel  | Moderate-carbohydrate vs. Low-fat    | 27          | Moderate carbohydrate: 54.7<br>Low fat: 51.2 | Moderate carbohydrate: 33.4<br>Low fat: 34.7 | Moderate carbohydrate: 7.3<br>Low fat: 6.9 | NA                              | 3                | Moderate carbohydrate:<br>45% carbohydrates, 10% protein, and 45% fat                                                                     | Low fat:<br>60% carbohydrates, 10% protein, 30% fat                                                                                                                           | NA     | 600 kcal/d energy deficit                                               | Moderate carbohydrate: NA<br>Low fat: NA    |

## Electronic Supplementary Material

|               |                |               |                                   |     |                                          |                                         |                                            |      |    |                                                                                                                                                                                                                                                   |                                                                                                    |    |                                                                      |                              |
|---------------|----------------|---------------|-----------------------------------|-----|------------------------------------------|-----------------------------------------|--------------------------------------------|------|----|---------------------------------------------------------------------------------------------------------------------------------------------------------------------------------------------------------------------------------------------------|----------------------------------------------------------------------------------------------------|----|----------------------------------------------------------------------|------------------------------|
| Ceriello 2014 | Italy          | RCT, parallel | Mediterranean vs. Low-fat         | 24  | NA                                       | Mediterranean: 29.8<br>Low-fat: 29.2    | Mediterranean: 8.1<br>Low-fat: 8.0         | 29%  | 3  | Mediterranean: Enriched with 50mL MUFAs, Mediterranean diet recommendations                                                                                                                                                                       | Low-fat: Recommendations to reduce all types of fat                                                | NA | No                                                                   | 0%                           |
| Coppell 2010  | New Zealand    | RCT, parallel | Low-fat vs. Control               | 93  | Low-fat: 56.6<br>Control: 58.4           | Low-fat: 35.1<br>Control: 34.2          | Low-fat: 8.9<br>Control: 8.6               | 59%  | 6  | Low-fat: Advice on PA, 45-60% carbohydrate, 20g/1000 kcal of fibre, half of fibre should be soluble, 10-20% protein, < 30% fat: <10% saturated fat (or <8% if LDL was high, PUFA < 10%)                                                           | Control: Advice on PA, no change in diet                                                           | NA | Low-fat: At least 5% weight loss for overweight or obese             | Low-fat: 11%;<br>Control: 8% |
| Daly 2005     | United Kingdom | RCT, parallel | Low-carbohydrate vs. Low-fat      | 102 | Low-carbohydrate: 58.2<br>Low-fat: 59.1  | Low-carbohydrate: 35.4<br>Low-fat: 36.7 | Low-carbohydrate: 9.0<br>Low-fat: 9.11     | 52%  | 3  | Low-carbohydrate: Up to 70g carbohydrates/d including 1/2 pint milk and 1 fruit                                                                                                                                                                   | Low-fat: Standard healthy eating advice, focused on reducing fat intake and reducing portion sizes | NA | No                                                                   | 23%                          |
| Davis 2009    | USA            | RCT, parallel | Low-carbohydrate vs. Low-fat      | 105 | Low-carbohydrate: 54<br>Low-fat: 53      | Low-carbohydrate: 35<br>Low-fat: 37     | Low-carbohydrate: 7.5<br>Low-fat: 7.4      | 78%  | 12 | Low-carbohydrate: 2 weeks carbohydrate restriction of 20-25g/d. 5g increment/week                                                                                                                                                                 | Low-fat: 25% fat                                                                                   | NA | No                                                                   | 19%                          |
| de Bont 1981  | United Kingdom | RCT, parallel | Moderate-carbohydrate vs. Low-fat | 148 | Moderate-carbohydrate: 54<br>Low-fat: 56 | NA                                      | Moderate-carbohydrate: 10.1<br>Low-fat: 10 | 100% | 6  | Moderate-carbohydrate: Goal of ≤40% carbohydrate                                                                                                                                                                                                  | Low-fat: goal of 30% fat                                                                           | NA | No                                                                   | 7%                           |
| Dyson 2007    | United Kingdom | RCT, parallel | Low-carbohydrate vs. Low-fat      | 12  | 56                                       | Low-carbohydrate: 36.5<br>Low fat: 33.3 | Low-carbohydrate: 7.2<br>Low fat: 7.5      | 70%  | 3  | Low-carbohydrate: 40 g/day and were given specific advice to take at least 200 ml of milk daily and include 4–5 portions of fruit and vegetables daily, with an emphasis on low-carbohydrate vegetables such as salads and green leafy vegetables | Low fat: Dietary guidelines of Diabetes UK                                                         | NA | Low-carbohydrate: unrestricted<br>Low fat: 500 kcal/d energy deficit | NA                           |



## Electronic Supplementary Material

|                  |                |               |                                      |     |                                              |                                              |                                              |     |    |                                                                                                                                                                                                                                 |                                                                                                                       |    |                                       |     |
|------------------|----------------|---------------|--------------------------------------|-----|----------------------------------------------|----------------------------------------------|----------------------------------------------|-----|----|---------------------------------------------------------------------------------------------------------------------------------------------------------------------------------------------------------------------------------|-----------------------------------------------------------------------------------------------------------------------|----|---------------------------------------|-----|
| Elhayany 2010    | Israel         | RCT, parallel | Mediterranean vs. Low-fat            | 259 | Mediterranean: 56<br>Low-fat: 56             | Mediterranean: 31<br>Low-fat: 31.8           | Mediterranean: 8.3<br>Low-fat: 8.3           | 48% | 12 | Mediterranean I:<br>50% carbohydrate, 30g fibre, 20% protein, 30% fat: of which 10% MUFA, 12% PUFA and 7% SFA<br>Mediterranean II:<br>35% carbohydrate, 30g fibre, 20% protein, 45% fat: of which 23% MUFA, 15% PUFA and 7% SFA | Low-fat:<br>50% carbohydrates, 15g fibre, 30% fat - of which 10% MUFA, 12% PUFA and 7% SFA - 20% protein              | NA | No                                    | 25% |
| Esposito 2009    | Italy          | RCT, parallel | Mediterranean vs. Low-fat            | 215 | Mediterranean: 52.4<br>Low-fat: 51.9         | Mediterranean: 29.7<br>Low-fat: 29.5         | Mediterranean: 7.75<br>Low-fat: 7.71         | 51% | 48 | Mediterranean:<br>Rich in vegetables, whole grains, low in red meat - replaced with poultry and fish - 30-50g olive oil; ≥50% complex carbohydrates, <30% fat                                                                   | Low-fat<br>Rich in whole grains and restricted additional fats, sweets, high-fat snacks; ≤30% fat: ≤10% saturated fat | NA | 1500 kcal/d women,<br>1800 kcal/d men | 9%  |
| Fabricatore 2011 | USA            | RCT, parallel | Low glycaemic index/load vs. Low-fat | 79  | Low-fat: 52.5<br>Low-GL: 52.8                | Low-fat: 35.8<br>Low-GL: 36.7                | Low-fat: 7.0<br>Low-GL: 6.6                  | 80% | 9  | Low-fat:<br>≤30% fat                                                                                                                                                                                                            | Low-GL:<br>≤3 and ≤1 servings/d of moderate-GL and high-GL foods, respectively                                        | NA | No                                    | 37% |
| Guldbrand 2012   | Sweden         | RCT, parallel | Low-carbohydrate vs. Low-fat         | 61  | Low-carbohydrate: 61.2<br>Low-fat: 62.7      | Low-carbohydrate: 31.6<br>Low-fat: 33.8      | Low-carbohydrate: 7.5<br>Low-fat: 7.2        | 56% | 24 | Low-carbohydrate:<br>20% carbohydrate, 30% protein, 50% fat                                                                                                                                                                     | Low-fat:<br>55-60% carbohydrate, 10-15% protein, 30% fat: ≤10% saturated fat                                          | NA | 1600 kcal/d women,<br>1800 kcal/d men | 0%  |
| Heilbronn 1999   | Australia      | RCT, parallel | Moderate-carbohydrate vs. Low-fat    | 25  | Moderate carbohydrate: 58.7<br>Low-fat: 57.5 | Moderate carbohydrate: 33.6<br>Low-fat: 32.6 | Moderate carbohydrate: 7.75<br>Low-fat: 8.51 | 80% | 3  | Moderate carbohydrate:<br>49% carbohydrates, 33% fat, 18% protein                                                                                                                                                               | Low-fat:<br>73% carbohydrates, 10% fat, 17% Protein                                                                   | NA | Energy restricted                     | 0%  |
| Hockaday 1978    | United Kingdom | RCT, parallel | Moderate-carbohydrate vs. Low-fat    | 93  | Moderate-carbohydrate: 53<br>Low-fat: 50     | NA                                           | NA                                           | 44% | 12 | Moderate-carbohydrate:<br>40% carbohydrate, 20% protein, 40% fat: 28% SFA and MUFA, 12% PUFA                                                                                                                                    | Low-fat:<br>54% carbohydrate, 20% protein, 26% fat: 10% SFA and MUFA, 16% PUFA                                        | NA | 1500 kcal/d                           | NA  |

Electronic Supplementary Material

|                  |           |                |                                      |     |                                             |                                                 |                                               |                                               |    |                                                                                                                                                          |                                                                                                                                                                |    |                                    |                                                                      |
|------------------|-----------|----------------|--------------------------------------|-----|---------------------------------------------|-------------------------------------------------|-----------------------------------------------|-----------------------------------------------|----|----------------------------------------------------------------------------------------------------------------------------------------------------------|----------------------------------------------------------------------------------------------------------------------------------------------------------------|----|------------------------------------|----------------------------------------------------------------------|
| Huang 2010       | Taiwan    | RCT, parallel  | Low-fat vs. Control                  | 154 | Low-fat: 56<br>Control: 57                  | Low-fat: 25.7<br>Control: 27.0                  | Low-fat: 8.0<br>Control: 8.4                  | 56%                                           | 12 | Low-fat: An individualized diet plan was created to maintain intake of protein, fat, and carbohydrate energy to 15–20, 25–30, and 50–60%                 | Control: Control group received the routine care practiced at their primary care, which may have also included a summary of basic dietary principles by Nurses | NA | NA                                 | Low-fat: 24%<br>Control: 27%                                         |
| Iqbal 2009       | USA       | RCT, parallel  | Low-carbohydrate vs. Low-fat         | 144 | 59.4                                        | 37.6                                            | Low-carbohydrate: 7.9<br>Low-fat: 7.6         | 10%                                           | 24 | Low-carbohydrate: Goal of 30g/d carbohydrates; more whole grains and unsaturated FAs encouraged                                                          | Low-fat: <7% saturated fats, <300 mg cholesterol, encouraged to increase fruits and vegetable intake                                                           | NA | Low-fat: 500 kcal/d energy deficit | 53% (weight was retrieved from medical records for 75% of drop outs) |
| Itsiopoulos 2011 | Australia | RCT, crossover | Mediterranean vs. Low-fat            | 31  | 59                                          | 30.7                                            | 7.1                                           | 41%                                           | 3  | Mediterranean: 44% carbohydrate, 12% protein, 40% fat: >50% from MUFA - , 4% alcohol from red wine, 47g/d fibre; 70% of foods provided by the study      | Low-fat: No alteration of diet 27% fat                                                                                                                         | NA | No                                 | 13%                                                                  |
| Jenkins 2008     | Canada    | RCT, parallel  | Low glycaemic index/load vs. Low-fat | 210 | Low glycaemic index/load: 60<br>Low-fat: 61 | Low glycaemic index/load: 30.6<br>Low-fat: 31.2 | 7.1                                           | 39%                                           | 6  | Low glycaemic index/load: 42–43% carbohydrate; from low-GI foods list in prescribed servings of 15g                                                      | Low-fat: 42–43% carbohydrate; from high-cereal fibre foods list in prescribed servings of 15g                                                                  | NA | No                                 | 26%                                                                  |
| Jenkins 2012     | Canada    | RCT, parallel  | Low glycaemic index/load vs. Low-fat | 121 | Low glycaemic index/load: 58<br>Low fat: 61 | Low glycaemic index/load: 31.4<br>Low fat: 29.9 | Low glycaemic index/load: 7.4<br>Low fat: 7.2 | Low glycaemic index/load: 47%<br>Low fat: 52% | 3  | Low glycaemic index/load: legume consumption was 1 cup per day approximately 190 g per day, or 2 servings per day) of cooked beans, chickpeas or lentils | Low fat: Whole wheat and whole grain carbohydrate foods: whole wheat breakfast cereals, breads, brown rice                                                     | NA | NA                                 | Low glycaemic index/load: 6%<br>Low fat: 5%                          |

## Electronic Supplementary Material

|               |                |                |                                      |     |                                             |                                             |                                               |                                               |    |                                                                                                                                                                                                                                                             |                                                                                                                                                                                                                                        |    |                                                                                                   |                                               |
|---------------|----------------|----------------|--------------------------------------|-----|---------------------------------------------|---------------------------------------------|-----------------------------------------------|-----------------------------------------------|----|-------------------------------------------------------------------------------------------------------------------------------------------------------------------------------------------------------------------------------------------------------------|----------------------------------------------------------------------------------------------------------------------------------------------------------------------------------------------------------------------------------------|----|---------------------------------------------------------------------------------------------------|-----------------------------------------------|
| Jenkins 2014  | Canada         | RCT, parallel  | Low glycaemic index/load vs. Low-fat | 141 | Low glycaemic index/load: 59<br>Low fat: 59 | Low glycaemic index/load: 30<br>Low fat: 31 | Low glycaemic index/load: 7.4<br>Low fat: 7.2 | Low glycaemic index/load: 46%<br>Low fat: 45% | 3  | Low glycaemic index/load: included: 4.5 slices of canola oil-enriched whole-wheat bread (500 kcal/d) provided as a supplement; low-GI foods, including legumes, barley, pasta, parboiled rice, and temperate-climate fruit, as outlined in previous studies | Low fat: 7.5 slices of whole-wheat bread without canola oil per day (500 kcal); participants were instructed to avoid white-flour products and replace them with whole-wheat breakfast cereals, study breads, brown rice, and so forth | NA | NA                                                                                                | Low glycaemic index/load: 21%<br>Low fat: 10% |
| Jönsson 2009  | Sweden         | RCT, crossover | Palaeolithic vs. Low-fat             | 13  | 64                                          | 30                                          | 6.6                                           | 23%                                           | 6  | Palaeolithic: Based on lean meat, fish, fruit, vegetables, eggs and nuts, excluding dairy's, cereal grains, beans, refined fats, sugar, candy, soft drinks, beer and added salt                                                                             | Low-fat: Increased vegetable, fibre, whole-grain cereal products and fruits; decreased total fat, saturated fat and salt                                                                                                               | NA | No                                                                                                | 0%                                            |
| Kahleova 2011 | Czech Republic | RCT, parallel  | Vegetarian vs. Low-fat               | 74  | Vegetarian: 54.6<br>Low-fat: 57.7           | Vegetarian: 35.1<br>Low-fat: 35             | Vegetarian: 7.6<br>Low-fat: 7.7               | 53%                                           | 6  | Vegetarian: 60% carbohydrate, 15% protein, 25% fat; animal products limited to 1 portion of low-fat yogurt/day                                                                                                                                              | Low-fat: 50% carbohydrate, 20% protein, <30% fat: ≤7% SFA, <200mg cholesterol                                                                                                                                                          | NA | 500 kcal/d energy deficit                                                                         | 16%                                           |
| Kaplan 1987   | USA            | RCT, parallel  | Low-fat vs. Control                  | 76  | Low fat: 57<br>Control: 54                  | NA                                          | Low fat: 9.18<br>Control: 8.16                | NA                                            | 18 | Low Fat: 50% carbohydrate, 20% protein, 30% fat                                                                                                                                                                                                             | Control: Standard dietary advice                                                                                                                                                                                                       | NA | 1200 kcal/d                                                                                       | NA                                            |
| Krebs 2012    | New Zealand    | RCT, parallel  | High-Protein vs. Low-fat             | 419 | 58                                          | 36.6                                        | 8.1                                           | 60%                                           | 12 | High-Protein: 40% carbohydrate, 30% protein, 30% fat                                                                                                                                                                                                        | Low-fat: 55% carbohydrate, 15% protein, 30% fat                                                                                                                                                                                        | NA | 500 kcal/d energy deficit                                                                         | 30%                                           |
| Larsen 2011   | Australia      | RCT, parallel  | High-Protein vs. Low-fat             | 99  | High-Protein: 59.6<br>Low-fat: 58.8         | 27-49                                       | High-Protein: 7.89<br>Low-fat: 7.78           | 52%                                           | 12 | High-Protein: 40% carbohydrate, 30% protein, 30% fat                                                                                                                                                                                                        | Low-fat: 55% carbohydrate, 15% protein, 30% fat                                                                                                                                                                                        | NA | 1500 kcal /d diet, or 30% energy restriction for 3 months; followed by 9 months of energy balance | 7%                                            |

## Electronic Supplementary Material

|              |       |                  |                                 |     |                                          |                                            |                                       |     |    |                                                                                                                                                                                                                                                                                                                                                                                                                                                                                                                                                                               |                                                                                                                                                                                |    |                                                                       |                                   |
|--------------|-------|------------------|---------------------------------|-----|------------------------------------------|--------------------------------------------|---------------------------------------|-----|----|-------------------------------------------------------------------------------------------------------------------------------------------------------------------------------------------------------------------------------------------------------------------------------------------------------------------------------------------------------------------------------------------------------------------------------------------------------------------------------------------------------------------------------------------------------------------------------|--------------------------------------------------------------------------------------------------------------------------------------------------------------------------------|----|-----------------------------------------------------------------------|-----------------------------------|
| Lasa<br>2014 | Spain | RCT,<br>parallel | Mediterranean<br>vs.<br>Low-fat | 191 | Mediterranean:<br>67<br>Low-fat:<br>67.2 | Mediterranean:<br>29.8<br>Low-fat:<br>29.8 | NA                                    | 60% | 12 | Mediterranean 1:<br>Mediterranean diet +<br>1L/week of virgin olive<br>oil<br>Mediterranean 2:<br>Mediterranean diet +<br>30g/d mixed nuts                                                                                                                                                                                                                                                                                                                                                                                                                                    | Low fat:<br><30% fat                                                                                                                                                           | NA | No                                                                    | no                                |
| Lee<br>2016  | Korea | RCT,<br>parallel | Vegetarian<br>vs.<br>Low-fat    | 93  | Vegetarian:<br>57.5<br>Low-fat:<br>58.3  | Vegetarian:<br>23.9<br>Low-fat:<br>23.1    | Vegetarian:<br>7.7<br>Low fat:<br>7.4 | 37% | 3  | Vegetarian:<br>Whole grains,<br>vegetables, fruit, and<br>legumes                                                                                                                                                                                                                                                                                                                                                                                                                                                                                                             | Low fat<br>(50–60% carbohydrate,<br>15–20% protein<br>(if renal function is<br>normal), <25% fat)                                                                              | NA | Low fat:<br>iso-caloric                                               | Vegan:<br>13%<br>Low fat:<br>11%  |
| Li<br>2016   | China | RCT,<br>parallel | Low-fat<br>vs.<br>Control       | 139 | Low fat:<br>59<br>Control:<br>59         | Low fat:<br>27.19<br>Control:<br>25.17     | Low fat:<br>8.10<br>Control:<br>8.05  | 48% | 12 | Low-fat:<br>Carbohydrate, 22% fat,<br>18% from protein                                                                                                                                                                                                                                                                                                                                                                                                                                                                                                                        | Control:<br>No dietary intervention                                                                                                                                            | NA | Low-fat:<br>2275 kcal d<br>for men<br>And 1890<br>kcal/d for<br>women | Low fat:<br>4%<br>Control:<br>2%  |
| Liu<br>2016  | China | RCT,<br>Parallel | Low-fat<br>vs.<br>Control       | 117 | Low fat:<br>63.3<br>Control:<br>62       | Low fat:<br>25.8<br>Control:<br>26.8       | Low fat:<br>7.55<br>Control:<br>7.78  | 61% | 12 | Low-fat:<br>Food groups are<br>assigned colours of the<br>traffic light. RED light<br>(stop and think): fat,<br>processed meats, cake,<br>and sugar-sweetened<br>drinks.<br>YELLOW light (good<br>for you, but watch<br>portion size): grains,<br>meat, poultry, fish and<br>shellfish, nuts, eggs,<br>and oil.<br>GREEN light (go, low<br>in calorie-density and<br>high in nutrients):<br>vegetables, fruits, dairy,<br>beans and legumes, and<br>water. The TLD guide<br>is provided to patients<br>with type 2<br>diabetes to help them<br>make healthier food<br>choices | Control:<br>Routine care<br>practiced at their<br>community health<br>service centres, which<br>may have included a<br>summary of basic<br>dietary principles<br>by clinicians | NA | NA                                                                    | Low fat:<br>10%<br>Control:<br>8% |

## Electronic Supplementary Material

|                 |             |               |                                               |     |                                                         |                                                         |                                                 |     |    |                                                                                                              |                                                                                                       |         |                                       |     |
|-----------------|-------------|---------------|-----------------------------------------------|-----|---------------------------------------------------------|---------------------------------------------------------|-------------------------------------------------|-----|----|--------------------------------------------------------------------------------------------------------------|-------------------------------------------------------------------------------------------------------|---------|---------------------------------------|-----|
| Luger 2013      | Austria     | RCT, parallel | High-protein vs. Low-fat                      | 44  | High-protein: 61<br>Low-fat: 63.7                       | High-protein: 33<br>Low-fat: 33.6                       | High-protein: 7.8<br>Low-fat: 7.6               | 54% | 3  | High-protein: 30 % protein 40 % carbohydrates: soy-based foods (e. g. tofu), milk products, fish and poultry | Low-fat: 15 % protein and 55 % carbohydrates                                                          | NA      | NA                                    | NA  |
| Ma 2008         | USA         | RCT, parallel | Low glycaemic index/load vs. Low-fat          | 40  | 53.5                                                    | 35.8                                                    | Low glycaemic index/load: 8.74<br>Low-fat: 8.10 | 53% | 12 | Low glycaemic index/load: 55% carbohydrate, which were ranked according to GI                                | Low-fat: 55% carbohydrate, counting - all treated the same                                            | NA      | No                                    | 0%  |
| McLaughlin 2007 | USA         | RCT, parallel | Moderate-carbohydrate vs. Low-fat             | 29  | Moderate-carbohydrate: 57<br>Low-fat: 56                | Moderate-carbohydrate: 31.4<br>Low-fat: 31              | NA                                              | 41% | 4  | Moderate-carbohydrate: 40% carbohydrate, 15% protein, 45% fat                                                | Low-fat: 60% carbohydrate, 15% protein, 25% fat                                                       | NA      | 750 kcal/d energy deficit             | 0%  |
| Milne 1994      | New Zealand | RCT, parallel | Moderate-carbohydrate vs. Low-fat vs. Control | 70  | Moderate-carbohydrate: 59<br>Low-fat: 60<br>Control: 58 | Moderate-carbohydrate: 29<br>Low-fat: 30<br>Control: 29 | 10                                              | 45% | 18 | Moderate carbohydrate: 45% carbohydrate, 19% protein, 36% fat; SFA:PUFA:MUFA = 1                             | Low-fat: 55% carbohydrate, ≥30g/d fibre, increase soluble fibre, 15% protein, 30% fat: ≤10 SFA        | Control | 500 kcal/d for BMI >25 energy deficit | 9%  |
| Mishra 2013     | USA         | RCT, parallel | Vegetarian vs. Low-fat                        | 291 | Vegetarian: 44.3<br>Low-fat: 46.1                       | Vegetarian: 34.7<br>Low-Fat: 35.3                       | Vegetarian: 7.54<br>Low-Fat: 7.05               | 83% | 4  | Vegetarian<br>Avoiding all animal products, <3g of fat from added oils/serving, favour low-GI foods          | Low-fat                                                                                               | NA      | No                                    | 28% |
| Nicholson 1999  | USA         | RCT, parallel | Vegetarian vs. Low-fat                        | 13  | Vegetarian: 51<br>Low-fat: 60                           | NA                                                      | Vegetarian: 8.3<br>Low-fat: 8.0                 | 46% | 3  | Vegetarian:<br>Whole grains, vegetables, legumes and fruits; 10-15% protein, <10% fat, rest carbohydrates    | Low-fat:<br>Fish and poultry rather than red meat; 55-60% carbohydrate, <30% fat, 200mg/d cholesterol | NA      | No                                    | 15% |

## Electronic Supplementary Material

|                |           |               |                                               |     |                                                                                                |                                                                                                |                                                            |     |    |                                                                                 |                                                                             |                                                                                                                                                     |                                                     |                             |
|----------------|-----------|---------------|-----------------------------------------------|-----|------------------------------------------------------------------------------------------------|------------------------------------------------------------------------------------------------|------------------------------------------------------------|-----|----|---------------------------------------------------------------------------------|-----------------------------------------------------------------------------|-----------------------------------------------------------------------------------------------------------------------------------------------------|-----------------------------------------------------|-----------------------------|
| Parker 2002    | Australia | RCT, parallel | High-protein vs. Low-fat                      | 54  | High-protein men: 63.4<br>High-protein women: 58.7<br>Low-fat men: 64.2<br>Low-fat women: 60.9 | High-protein men: 35.4<br>High-protein women: 34.5<br>Low-fat men: 33.4<br>Low-fat women: 33.2 | High-protein: 6.42<br>Low-fat: 6.30                        | 65% | 3  | High-protein: 42% carbohydrate, 28% protein, 28% fat: 8% SFA, 12% MUFA, 5% PUFA | Low-fat: 55% carbohydrate, 16% protein, 26% fat: 8% SFA, 11% MUFA, 5% PUFA) | NA                                                                                                                                                  | 8 weeks 1600 kcal/d, 4 weeks energy balance         | 0%                          |
| Pedersen 2014  | Australia | RCT, parallel | High-protein vs. Low-fat                      | 76  | High-protein: 59.4<br>Low-fat: 62.4                                                            | High-protein: 36.7<br>Low-fat: 35.4                                                            | High-protein: 7.5<br>Low-fat: 7.1                          | 22% | 12 | High-protein: 40% carbohydrate, 30% protein, 30% fat                            | Low-fat (50% carbohydrate, 20% protein, 30% fat)                            | NA                                                                                                                                                  | 1430 kcal/d                                         | 41%                         |
| Pritchard 1999 | Australia | RCT, parallel | Low-fat vs. Control                           | 17  | NA                                                                                             | NA                                                                                             | NA                                                         | NA  | 12 | Low fat: >50% carbohydrates, <30% fat                                           | Control: no intervention                                                    | NA                                                                                                                                                  | NA                                                  | Low fat: 28%<br>Control: 0% |
| Rock 2014      | USA       | RCT, parallel | Moderate-carbohydrate vs. Low-fat vs. Control | 227 | 56                                                                                             | Moderate-carbohydrate: 36.2<br>Low-fat: 36<br>Control: 36.3                                    | Moderate-carbohydrate: 7.3<br>Low-fat: 7.5<br>Control: 7.4 | 51% | 12 | Moderate-carbohydrate 45% carbohydrate, 25% protein, 30% fat                    | Low-fat: 60% carbohydrate, 20% protein, 20% fat                             | Control: Counselling sessions with advice for 500-1000 kcal/d deficit and Dietary Guidelines for Americans: 55% carbohydrates, 15% protein, 30% fat | Moderate-carbohydrate and Low-Fat: 1200-2000 kcal/d | 10%                         |

## Electronic Supplementary Material

|             |           |               |                                                |     |                                                       |                                                       |                                                     |                                                     |    |                                                                                                                                                                                                                           |                                                                                                                                                                               |                                                                                                                                     |                                                                        |                                          |
|-------------|-----------|---------------|------------------------------------------------|-----|-------------------------------------------------------|-------------------------------------------------------|-----------------------------------------------------|-----------------------------------------------------|----|---------------------------------------------------------------------------------------------------------------------------------------------------------------------------------------------------------------------------|-------------------------------------------------------------------------------------------------------------------------------------------------------------------------------|-------------------------------------------------------------------------------------------------------------------------------------|------------------------------------------------------------------------|------------------------------------------|
| Saslow 2014 | USA       | RCT, parallel | Low-carbohydrate vs. Moderate carbohydrate     | 34  | Low-carbohydrate: 64.8<br>Moderate carbohydrate: 55.1 | Low-carbohydrate: 26.7<br>Moderate carbohydrate: 26.5 | Low-carbohydrate: 6.6<br>Moderate carbohydrate: 6.9 | Low-carbohydrate: 56%<br>Moderate carbohydrate: 89% | 3  | Low-carbohydrate: Reduce carbohydrate intake over 7–10 days to between 20–50 grams of carbohydrates a day, not including fibre: referred to as net grams of carbohydrates; with the goal of achieving nutritional ketosis | Moderate carbohydrate: Low fat, calorie-restricted, carbohydrate counting diet consistent with guidelines from American Diabetes Association, 45% calories from carbohydrates | NA                                                                                                                                  | Low-carbohydrate: unrestricted<br>Low fat: - 500 kcal/d energy deficit | 0%                                       |
| Sato 2016   | Japan     | RCT, parallel | Moderate-carbohydrate vs. Low-fat              | 62  | Moderate carbohydrate: 60.5<br>Low fat: 58.4          | Moderate carbohydrate: 26.7<br>Low fat: 26.5          | Moderate carbohydrate: 8<br>Low fat: 8.3            | 24%                                                 | 6  | Moderate carbohydrate: 130g/d carbohydrates                                                                                                                                                                               | Low fat: 50-60% carbohydrates                                                                                                                                                 | NA                                                                                                                                  | unrestricted                                                           | Moderate carbohydrate: 9%<br>Low fat: 3% |
| Shai 2008   | Israel    | RCT, parallel | Mediterranean vs. Low-fat vs. Low-carbohydrate | 36  | NA                                                    | NA                                                    | NA                                                  | 14%                                                 | 24 | Mediterranean: 35% fat adding olive oil and nuts, 2 portions fish/week                                                                                                                                                    | Low-fat: 30% fat, 10% SFA, 300mg cholesterol                                                                                                                                  | Low-carbohydrate (based on Atkins diet; aim 20g/d carbohydrates for 2 months and gradual increase to weight loss maintenance level) | Low-fat and Mediterranean an (increasing restriction, unspecified)     | 15%                                      |
| Shige 2000  | Australia | RCT, parallel | Moderate-carbohydrate vs. Low-fat              | 24  | Moderate carbohydrate: 58.1<br>Low fat: 57.5          | Moderate carbohydrate: 33.1<br>Low fat: 32.6          | Moderate carbohydrate: 7.9<br>Low fat: 8.5          | 79%                                                 | 3  | Moderate carbohydrate: 50% carbohydrate, 18% protein, and 32% fat                                                                                                                                                         | Low fat: 73% carbohydrates, 17% protein, 9% fat                                                                                                                               | NA                                                                                                                                  | 30% energy restriction                                                 | 0%                                       |
| Stern 2004  | USA       | RCT, parallel | Low-carbohydrate vs. Low-fat                   | 54  | Low-carbohydrate: 53<br>Low-fat: 54                   | Low-carbohydrate: 42.9<br>Low-fat: 42.9               | Low-carbohydrate: 7.4<br>Low-fat: 7.3               | 17%                                                 | 12 | Low-carbohydrate: <30g/d carbohydrates                                                                                                                                                                                    | Low-fat: <30% fat                                                                                                                                                             | NA                                                                                                                                  | Low-fat diet: 500 kcal/d energy deficit                                | 34%                                      |
| Tay 2015    | Australia | RCT, parallel | Low-carbohydrate vs. Low-fat                   | 115 | 58                                                    | 34.6                                                  | 7.3                                                 | 43%                                                 | 12 | Low-carbohydrate: 14% carbohydrate (<50g), 28% protein, 58% fat: <10% SFA                                                                                                                                                 | Low-fat: 53% carbohydrate, 17% protein, 30% fat: <10% SFA                                                                                                                     | NA                                                                                                                                  | Diets were matched for energy with 500-1000 kcal/d deficit             | 33%                                      |

## Electronic Supplementary Material

|               |           |                |                                                                |     |                                                                                      |                                                                                |                                                                             |                                   |    |                                                                                                                      |                                                                         |                                                           |                                                            |                                         |
|---------------|-----------|----------------|----------------------------------------------------------------|-----|--------------------------------------------------------------------------------------|--------------------------------------------------------------------------------|-----------------------------------------------------------------------------|-----------------------------------|----|----------------------------------------------------------------------------------------------------------------------|-------------------------------------------------------------------------|-----------------------------------------------------------|------------------------------------------------------------|-----------------------------------------|
| Uusitupa 1993 | Sweden    | RCT, parallel  | Low-fat vs. Control                                            | 86  | Low-fat men: 50.7<br>Low-fat women: 53.7<br>Control men: 54.0<br>Control women: 54.4 | Low-fat: 33.2<br>Control: 32.7                                                 | Low-fat: 8.4<br>Control: 9.0                                                | 43%                               | 12 | Low-fat: <30% fat: <10% SFA, cholesterol <250-300 mg/d, increase in unrefined carbohydrates, regular eating patterns | Control: Usual diet                                                     | NA                                                        | Low-Fat: individually planned energy restriction           | 0% (4 drop-outs excluded from analysis) |
| Walker 1995   | Australia | RCT, crossover | Moderate-carbohydrate vs. Low-fat                              | 24  | 58                                                                                   | 29.2                                                                           | Moderate-carbohydrate: 6.4<br>Low fat: 6.8                                  | 63%                               | 3  | Moderate carbohydrate: 40% carbohydrate, 20% protein, 40% fat                                                        | Low-fat: 59% carbohydrate, 20% protein, 21% fat                         | NA                                                        | Iso-caloric                                                | NA                                      |
| Watson 2016   | Australia | RCT, parallel  | High-protein vs. Low-fat                                       | 61  | High-protein: 54<br>Low-fat: 55                                                      | High-protein: 34.3<br>Low fat: 34.4                                            | High-protein: 8<br>Low fat: 8.1                                             | High-protein: 47%<br>Low fat: 45% | 3  | High-protein: 38% carbohydrate, 30% protein, 29% fat                                                                 | Low-fat: 53% carbohydrate, 21% protein, 23% fat                         | NA                                                        | Iso-caloric                                                | High-protein: 28%<br>Low fat: 28%       |
| Westman 2008  | USA       | RCT, parallel  | Low-carbohydrate vs. Low glycaemic index/load                  | 84  | Low-carbohydrate: 51.8<br>Low glycaemic index/load: 51.8                             | Low-carbohydrate: 37.7<br>Low glycaemic index/load: 38.5                       | Low-carbohydrate: 8.8<br>Low glycaemic index/load: 8.3                      | 79%                               | 6  | Low-carbohydrate: <20g carbohydrates, unlimited amounts of animal foods and eggs, limited cheese and vegetables      | Low glycaemic index/load: 55% carbohydrate, low-GI foods                | NA                                                        | Low glycaemic index/load: 500 kcal/d energy deficit        | 42%                                     |
| Wolever 2008  | Canada    | RCT, parallel  | Low glycaemic index/load vs. Low-fat vs. Moderate-carbohydrate | 162 | Low glycaemic index/load: 60.6<br>Moderate-carbohydrate: 58.6<br>Low-fat: 60.4       | Low glycaemic index/load: 31.6<br>Moderate-carbohydrate: 31.1<br>Low-fat: 30.1 | Low glycaemic index/load: 6.2<br>moderate-carbohydrate: 6.1<br>Low-fat: 6.2 | 54%                               | 12 | Low glycaemic index/load: GI of 55; 52% carbohydrate, 21% protein, 27% fat                                           | Moderate-carbohydrate: GI of 59; 39% carbohydrate, 21% protein, 40% fat | Low-fat: GI of 63; 47% carbohydrate, 22% protein, 31% fat | Energy deficit 500 kcal/d if subject wished to lose weight | 20%                                     |



## Electronic Supplementary Material

|                |           |               |                                   |    |                                              |                                            |                                            |     |   |                                                                                                         |                                                        |                                       |     |    |
|----------------|-----------|---------------|-----------------------------------|----|----------------------------------------------|--------------------------------------------|--------------------------------------------|-----|---|---------------------------------------------------------------------------------------------------------|--------------------------------------------------------|---------------------------------------|-----|----|
| Wycherley 2010 | Australia | RCT, parallel | High-protein vs. Low-fat          | 83 | 56                                           | 35.4                                       | High-protein: 6.8-8.0<br>Low-fat: 7.3-7.6  | NA  | 4 | High-protein: 43% carbohydrate, 33% protein, 22% fat<br>Low-fat: 53% carbohydrate, 19% protein, 26% fat | NA                                                     | Women 1400 kcal/d;<br>Men 1700 kcal/d | 29% |    |
| Yamada 2014    | Japan     | RCT, parallel | Moderate-carbohydrate vs. Low-fat | 24 | Moderate-carbohydrate: 63.3<br>Low-fat: 63.2 | Moderate-carbohydrate: 24.5<br>Low-fat: 27 | Moderate-carbohydrate: 7.6<br>Low fat: 7.7 | 50% | 6 | Moderate-carbohydrate <130 g/day; lower limit of carbohydrate intake to 70 g/d                          | Low-fat: Carbohydrates 50-60%, protein 20% and fat 25% | NA                                    | NA  | 0% |

Supplementary Table S2: General study characteristics of the included trials investigating the effects of different dietary approaches on glycaemic control

d: Day; FA: fatty acids; GI: glycaemic index; GL: glycaemic load; kcal: kilocalorie; LDL-C: low-density lipoprotein cholesterol; MUFA: monounsaturated fat; NA: not applicable; PA: physical activity; PUFA: polyunsaturated fat; RCT: randomized controlled trial; SFA: saturated fat

## Electronic Supplementary Material

| Reference       | Comparison Diets         | Presence of comorbidities                                     | Hypoglycaemic drugs (%)                                                            | Antihypertensive medication (%) | Lipid lowering medication (%) | Risk of bias | Body weight |
|-----------------|--------------------------|---------------------------------------------------------------|------------------------------------------------------------------------------------|---------------------------------|-------------------------------|--------------|-------------|
| Andrews 2016    | Control                  | NA                                                            | 35                                                                                 | 59                              | 64                            | L            | 89          |
|                 | Low-fat                  | NA                                                            | 40                                                                                 | 68                              | 65                            | L            | 94          |
| Barnard 2009    | Vegetarian               | 18 (eye involvement), 12 (renal involvement), 37 (neuropathy) | 69 (metformin), 22 (insulin), 51 (sulfonylurea), 33 (thiazolidinedione), 2 (other) | 63                              | 55                            | H            | 93          |
|                 | Low-fat                  | 20 (eye involvement), 8 (renal involvement), 48 (neuropathy)  | 78 (metformin), 10 (insulin), 58 (sulfonylurea), 30 (thiazolidinedione), 4 (other) | 76                              | 54                            | H            | 96          |
| Brand 1994      | Low glycaemic index/load | NA                                                            | 63 (oral hypoglycaemic agents)                                                     | NA                              | NA                            | H            | 76          |
|                 | Low-fat                  | NA                                                            | 64 (oral hypoglycaemic agents)                                                     | NA                              | NA                            | H            | 76          |
| Brehm 2009      | Moderate-carbohydrate    | NA                                                            | NA                                                                                 | NA                              | NA                            | H            | 100         |
|                 | Low-fat                  | NA                                                            | NA                                                                                 | NA                              | NA                            | H            | 98          |
| Brinkworth 2004 | High-Protein             | NA                                                            | NA                                                                                 | NA                              | NA                            | H            | 92          |
|                 | Low-fat                  | NA                                                            | NA                                                                                 | NA                              | NA                            | H            | 89          |
| Brunerova 2007  | Moderate-carbohydrate    | NA                                                            | NA                                                                                 | NA                              | NA                            | H            | 90          |
|                 | Low-fat                  | NA                                                            | NA                                                                                 | NA                              | NA                            | H            | 98          |

## Electronic Supplementary Material

|               |                       |    |                                                                                       |    |    |   |    |
|---------------|-----------------------|----|---------------------------------------------------------------------------------------|----|----|---|----|
| Ceriello 2014 | Mediterranean         | NA | NA                                                                                    | NA | NA | H | NA |
|               | Low-fat               | NA | NA                                                                                    | NA | NA | H | NA |
| Coppell 2010  | Control               |    | 71 (oral hypoglycaemic agents) 0 (insulin) 29 (oral hypoglycaemic agents and insulin) | 63 | 48 | L | 96 |
|               | Low-fat               |    | 69 (oral hypoglycaemic agents) 1 (insulin) 29 (oral hypoglycaemic agents and insulin) | 53 | 31 | L | 95 |
|               | Low-carbohydrate      | NA | 40 (oral hypoglycaemic agent), 20 (insulin), 40 (oral hypoglycaemic agent + insulin)  | NA | NA | H | 55 |
| Daly 2005     | Low-fat               | NA | 41 (oral hypoglycaemic agent), 20 (insulin), 40 (oral hypoglycaemic agent + insulin)  | NA | NA | H | 58 |
|               | Low-carbohydrate      | NA | 78 (metformin), 44 (sulfonylurea), 35 (insulin)                                       | NA | 62 | H | 91 |
| Davis 2009    | Low-fat               | NA | 86 (metformin), 52 (sulfonylurea), 24 (insulin)                                       | NA | 56 | H | 98 |
| de Bont 1981  | Moderate-carbohydrate | NA | 65 (oral hypoglycaemic drugs), 2 (insulin)                                            | NA | NA | H | 72 |
|               | Low-fat               | NA | 62 (oral hypoglycaemic                                                                | NA | NA | H | 72 |

Electronic Supplementary Material

|                  |                          |    |                                                                                       |    |    |   |    |
|------------------|--------------------------|----|---------------------------------------------------------------------------------------|----|----|---|----|
|                  |                          |    | drugs), 1 (insulin)                                                                   |    |    |   |    |
| Dyson 2007       | Low-carbohydrate         | NA | NA                                                                                    | NA | NA | H | 92 |
|                  | Low-fat                  | NA | NA                                                                                    | NA | NA | H | 96 |
| Elhayany 2010    | Mediterranean            | NA | NA                                                                                    | NA | NA | H | 78 |
|                  | Low-fat                  | NA | NA                                                                                    | NA | NA | H | 80 |
| Esposito 2009    | Mediterranean            | NA | NA                                                                                    | 24 | 15 | L | 82 |
|                  | Low-fat                  | NA | NA                                                                                    | 23 | 16 | L | 83 |
| Fabricatore 2011 | Low glycaemic index/load | NA | NA                                                                                    | NA | NA | H | 96 |
|                  | Low-fat                  | NA | NA                                                                                    | NA | NA | H | 92 |
| Guldbrand 2012   | Low-carbohydrate         | NA | 50 (oral glucose-lowering medication), 33 (oral glucose-lowering medication+ insulin) | NA | NA | L | 89 |
|                  | Low-fat                  | NA | 42 (oral glucose-lowering medication), 35 (oral glucose-lowering medication+ insulin) | NA | NA | L | 96 |
| Heilbronn 1999   | Moderate-carbohydrate    | NA | 49 (oral hypoglycaemic                                                                | NA | NA | H | NA |

## Electronic Supplementary Material

|                 |                           |                                                  |                                                           |    |    |   |     |
|-----------------|---------------------------|--------------------------------------------------|-----------------------------------------------------------|----|----|---|-----|
|                 |                           |                                                  | agents)                                                   |    |    |   |     |
|                 | Low-fat                   | NA                                               | 50 (oral hypoglycaemic agents)                            | NA | NA | H | NA  |
| Hockaday 1978   | Moderate-carbohydrate     | NA                                               | NA                                                        | NA | NA | H | 73  |
|                 | Low-fat                   | NA                                               | NA                                                        | NA | NA | H | 78  |
| Huang 2010      | Control                   | NA                                               | 95 (sulfonylurea), 83 (biguanide), 23 (thiazolidinedione) | 81 | 22 | L | NA  |
|                 | Low-fat                   | NA                                               | 96 (sulfonylurea), 80 (biguanide), 13 (thiazolidinedione) | 61 | 40 | L | NA  |
| Iqbal 2009      | Low-carbohydrate          | 27 (coronary artery disease), 7 (heart failure)  | 85 (oral medications), 30 (insulin)                       | 63 | 46 | H | 116 |
|                 | Low-fat                   | 26 (coronary artery disease), 15 (heart failure) | 85 (oral medications), 23 (insulin)                       | 69 | 62 | H | 115 |
| Itsopoulos 2011 | Mediterranean             | NA                                               | 56 (oral hypoglycaemic agents), 11 (insulin)              | 48 | 26 | H | NA  |
|                 | Low-fat                   | NA                                               | 57 (oral hypoglycaemic agents), 11 (insulin)              | 48 | 26 | H | NA  |
| Jenkins 2008    | Low glycaemic index/ load | NA                                               | 100 (anti-hyperglycaemic medications)                     | 66 | 67 | L | 85  |
|                 | Low-fat                   | NA                                               | 98 (anti-hyperglycaemic medications)                      | 65 | 60 | L | 86  |

## Electronic Supplementary Material

|               |                          |    |                                                                       |    |    |   |    |
|---------------|--------------------------|----|-----------------------------------------------------------------------|----|----|---|----|
| Jenkins 2012  | Low glycaemic index/load | NA | 100 (anti-hyperglycaemic medications)                                 | 72 | 73 | L | 83 |
|               | Low-fat                  | NA | 100 (anti-hyperglycaemic medications)                                 | 61 | 67 | L | 86 |
| Jenkins 2014  | Low glycaemic index/load | NA | 100 (anti-hyperglycaemic medications)                                 | 56 | 71 | L | 83 |
|               | Low-fat                  | NA | 100 (anti-hyperglycaemic medications)                                 | 61 | 72 | L | 82 |
| Jönsson 2009  | Palaeolithic             | NA | 69 (metformin), 23 (sulfonylurea), 23 (thiazolidinedione)             | 37 | 62 | L | 81 |
|               | Low-fat                  | NA | 70 (metformin), 23 (sulfonylurea), 23 (thiazolidinedione)             | 37 | 62 | L | 84 |
| Kahleova 2011 | Vegetarian               | NA | 76 (metformin), 35 (sulfonylurea), 14 (thiazolidinedione), 8 (other)  | 68 | 59 | H | 95 |
|               | Low-fat                  | NA | 79 (metformin), 54 (sulfonylurea), 19 (thiazolidinedione), 22 (other) | 59 | 43 | H | 98 |
| Kaplan 1987   | Low-fat                  | NA | 76 (oral hypoglycaemic agents), 50 (insulin)                          | NA | NA | H | NA |
|               | Control                  | NA | 77 (oral hypoglycaemic                                                | NA | NA | H | NA |

## Electronic Supplementary Material

|             |               |                                 |                                                                 |    |    |   |     |
|-------------|---------------|---------------------------------|-----------------------------------------------------------------|----|----|---|-----|
|             |               |                                 | agents), 50 (insulin)                                           |    |    |   |     |
| Krebs 2012  | High-protein  | NA                              | 56 (oral agents), 25 (insulin + oral agents)                    | 77 | 62 | L | 100 |
|             | Low-fat       | NA                              | 57 (oral agents), 29 (insulin + oral agents)                    | 75 | 69 | L | 96  |
| Larsen 2011 | High-protein  | NA                              | 74 (oral agents), 15 (insulin)                                  | NA | NA | L | 92  |
|             | Low-fat       | NA                              | 73 (oral agents), 19 (insulin)                                  | NA | NA | L | 93  |
| Lasa 2014   | Mediterranean | NA                              | NA                                                              | NA | NA | L | NA  |
|             | Low-fat       | NA                              | NA                                                              | NA | NA | L | NA  |
| Lee 2016    | Vegetarian    | 13 (history of eye involvement) | 74 (metformin), 37 (sulfonylurea), 17 (insulin), 30 (other)     | 39 | 50 | L | NA  |
|             | Low-fat       | 13 (history of eye involvement) | 77 (metformin), 45 (sulfonylurea), 17 (insulin), 40 (other)     | 47 | 55 | L | NA  |
| Li 2016     | Control       | NA                              | 53 (oral diabetic drugs), 20 (insulin), 18 (combined treatment) | NA | NA | H | 71  |
|             | Low-fat       | NA                              | 57 (oral diabetic drugs), 18 (insulin), 16 (combined treatment) | NA | NA | H | 73  |

Electronic Supplementary Material

|                 |                          |                          |                                                                     |    |    |    |     |
|-----------------|--------------------------|--------------------------|---------------------------------------------------------------------|----|----|----|-----|
|                 | Control                  | NA                       | NA                                                                  | NA | NA | H  | 67  |
| Liu 2016        | Low-fat                  | NA                       | NA                                                                  | NA | NA | H  | 65  |
| Luger 2013      | High-protein             | NA                       | NA                                                                  | NA | L  | 91 | NA  |
|                 | Low-fat                  | NA                       | NA                                                                  | NA | L  | 91 | NA  |
| Ma 2008         | Low glycaemic index/load | NA                       | 73 (metformin), 38 (glyburide), 25 (hypoglycaemic agents + insulin) | NA | NA | H  | 94  |
|                 | Low-fat                  | NA                       | 73 (metformin), 38 (glyburide), 25 (hypoglycaemic agents + insulin) | NA | NA | H  | 101 |
|                 | Moderate-carbohydrate    | NA                       | NA                                                                  | NA | NA | H  | 89  |
| McLaughlin 2007 | Low-fat                  | NA                       | NA                                                                  | NA | NA | H  | 83  |
| Milne 1994      | Moderate-carbohydrate    | 50 (hypoglycaemic drugs) | NA                                                                  | NA | H  | 82 | NA  |
|                 | Low-fat                  | 57 (hypoglycaemic drugs) | NA                                                                  | NA | H  | 80 | NA  |



## Electronic Supplementary Material

|                |              |                             |                                         |     |    |    |    |
|----------------|--------------|-----------------------------|-----------------------------------------|-----|----|----|----|
|                | Control      | 52 (hypoglycaemic drugs)    | NA                                      | NA  | H  | 80 | NA |
| Mishra 2013    | Vegetarian   | NA                          | NA                                      | NA  | NA | H  | 94 |
|                | Low-fat      | NA                          | NA                                      | NA  | NA | H  | 96 |
| Nicholson 1999 | Vegetarian   | 14 (coronary artery bypass) | 86 (hypoglycaemic agents), 29 (insulin) | 86  | NA | H  | 90 |
|                | Low-fat      | 25 (coronary artery bypass) | 100 (hypoglycaemic agents), 0 (insulin) | 100 | NA | H  | 93 |
| Parker 2002    | High-Protein | NA                          | 48 (hypoglycaemic agents), 7 (insulin)  | NA  | NA | H  | 92 |
|                | Low-fat      | NA                          | 49 (hypoglycaemic agents), 7 (insulin)  | NA  | NA | H  | 87 |
| Pedersen 2014  | High-Protein | NA                          | 91 (oral agents or insulin)             | 100 | 96 | L  | 98 |
|                | Low-fat      | NA                          | 92 (oral agents or insulin)             | 100 | 96 | L  | 98 |

## Electronic Supplementary Material

|                |                       |                                                                       |                                                         |    |    |   |     |
|----------------|-----------------------|-----------------------------------------------------------------------|---------------------------------------------------------|----|----|---|-----|
| Pritchard 1999 | Control               | NA                                                                    | NA                                                      | NA | NA | H | NA  |
|                | Low-fat               | NA                                                                    | NA                                                      | NA | NA | H | NA  |
| Rock 2014      | Moderate-carbohydrate | 79 (hypertension), 70 (high cholesterol), 5 (Coronary artery disease) | 90 (oral hypoglycaemic agents), 13 (insulin)            | 84 | 68 | L | 97  |
|                | Low-fat               | 62 (hypertension), 62 (high cholesterol), 7 (Coronary artery disease) | 84 (oral hypoglycaemic agents), 26 (insulin)            | 70 | 66 | L | 98  |
|                | Control               | 75 (hypertension), 74 (high cholesterol), 1 (Coronary artery disease) | 82 (oral hypoglycaemic agents), 16 (insulin)            | 79 | 75 | L | 102 |
| Saslow 2014    | Low-carbohydrate      | 63 (Hypertension), 81 (dyslipidaemia)                                 | 31 (metformin), 44 (metformin + another diabetes agent) | NA | NA | L | 95  |
|                | Moderate-carbohydrate | 78 (Hypertension), 56 (dyslipidaemia)                                 | 44 (metformin), 28 (metformin + another diabetes agent) | NA | NA | L | 97  |
| Sato 2016      | Moderate-carbohydrate | NA                                                                    | 63 (metformin), 37 (sulfonylureas), 23 (insulin)        | 37 | 66 | H | 68  |
|                | Low-fat               | NA                                                                    | 66 (metformin), 44 (sulfonylureas), 40 (insulin)        | 41 | 69 | H | 73  |
| Shai 2008      | Mediterranean         | NA                                                                    | NA                                                      | NA | NA | L | NA  |

Electronic Supplementary Material

|               |                       |                                                                                          |                                                                        |    |    |   |    |
|---------------|-----------------------|------------------------------------------------------------------------------------------|------------------------------------------------------------------------|----|----|---|----|
|               | Low-fat               | NA                                                                                       | NA                                                                     | NA | NA | L | NA |
|               | Low-carbohydrate      | NA                                                                                       | NA                                                                     | NA | NA | L | NA |
| Shige 2000    | Moderate-carbohydrate | NA                                                                                       | NA                                                                     | NA | NA | H | 84 |
|               | Low-fat               | NA                                                                                       | NA                                                                     | NA | NA | H | 83 |
| Stern 2004    | Low-carbohydrate      | NA                                                                                       | NA                                                                     | NA | NA | L | NA |
|               | Low-fat               | NA                                                                                       | NA                                                                     | NA | NA | L | NA |
| Tay 2015      | Low-carbohydrate      | NA                                                                                       | 79 (metformin), 34 (sulfonylurea), 5 (thiazolidinedione), 10 (insulin) | 71 | 60 | L | 88 |
|               | Low-fat               | NA                                                                                       | 72 (metformin), 28 (sulfonylurea), 5 (thiazolidinedione), 11 (insulin) | 61 | 63 | L | 90 |
| Uusitupa 1993 | Control               | 7 (myocardial infarction), 17 (angina pectoris), 9 (cardiac failure), 46 (hypertension)  | NA                                                                     | NA | NA | H | NA |
|               | Low-fat               | 8 (myocardial infarction), 18 (angina pectoris), 10 (cardiac failure), 48 (hypertension) | NA                                                                     | NA | NA | H | NA |

## Electronic Supplementary Material

|                |                          |                                     |                                                  |    |    |    |    |
|----------------|--------------------------|-------------------------------------|--------------------------------------------------|----|----|----|----|
| Walker 1995    | Moderate-carbohydrate    | NA                                  | NA                                               | NA | NA | H  | 79 |
|                | Low-fat                  | NA                                  | NA                                               | NA | NA | H  | 79 |
|                | High-Protein             | NA                                  | 58 (metformin), 16 (sulfonylureas), 19 (insulin) | 61 | 52 | H  | 88 |
| Watson 2016    | Low-fat                  | NA                                  | 64 (metformin), 18 (sulfonylureas), 21 (insulin) | 43 | 64 | H  | 94 |
| Westman 2008   | Low glycaemic index/load | NA                                  | 76 (hypoglycaemic medications)                   | NA | NA | L  | 97 |
|                | Low-carbohydrate         | NA                                  | 95 (hypoglycaemic medications)                   | NA | NA | L  | 98 |
| Wolever 2008   | Moderate-carbohydrate    | NA                                  | 0                                                | 48 | 43 | L  | 84 |
|                | Low-fat                  | NA                                  | 0                                                | 48 | 43 | L  | 84 |
|                | Low glycaemic index/load | NA                                  | 0                                                | 48 | 43 | L  | 84 |
| Wycherley 2010 | High-Protein             | NA                                  | NA                                               | 56 | 61 | 49 | H  |
|                | Low-fat                  | NA                                  | NA                                               | 56 | 61 | 49 | H  |
| Yamada 2014    | Moderate-carbohydrate    | 17 (retinopathy), 100 (nephropathy) | 42 (metformin), 42 (sulfonylureas), 25 (insulin) | NA | NA | L  | 64 |

### Electronic Supplementary Material

|  |         |                                     |                                                 |    |    |   |    |
|--|---------|-------------------------------------|-------------------------------------------------|----|----|---|----|
|  | Low-fat | 17 (retinopathy), 100 (nephropathy) | 8 (metformin), 67 (sulfonylureas), 33 (insulin) | NA | NA | L | 67 |
|--|---------|-------------------------------------|-------------------------------------------------|----|----|---|----|

Supplementary Table S3: Study characteristics including presence of comorbidities, medication status, average risk of bias, and body weight of the included trials investigating the effects of different dietary approaches on glycaemic control

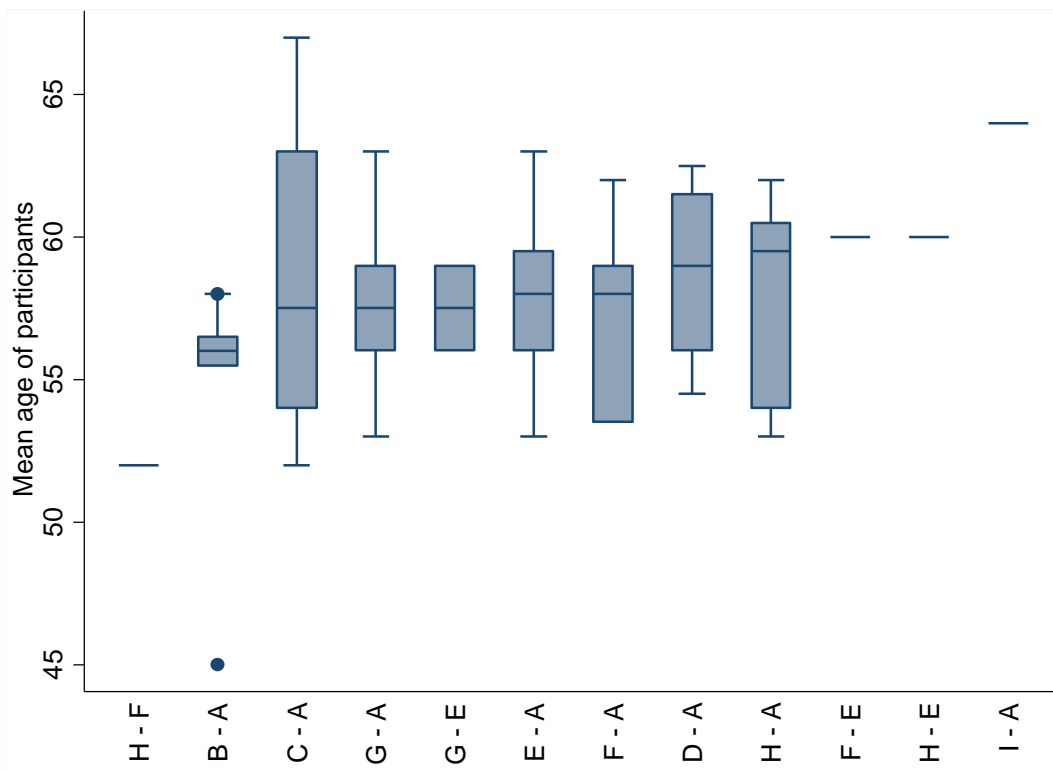

Supplementary Figure S3: Box plots showing the distribution of the mean age (years) of the trials across the available direct comparisons.

[A=Low-fat, B=Vegetarian, C=Mediterranean, D=High-Protein, E=Moderate-carbohydrate, F=Low-carbohydrate, G=control, H=Low GI/GL, I=Palaeolithic].

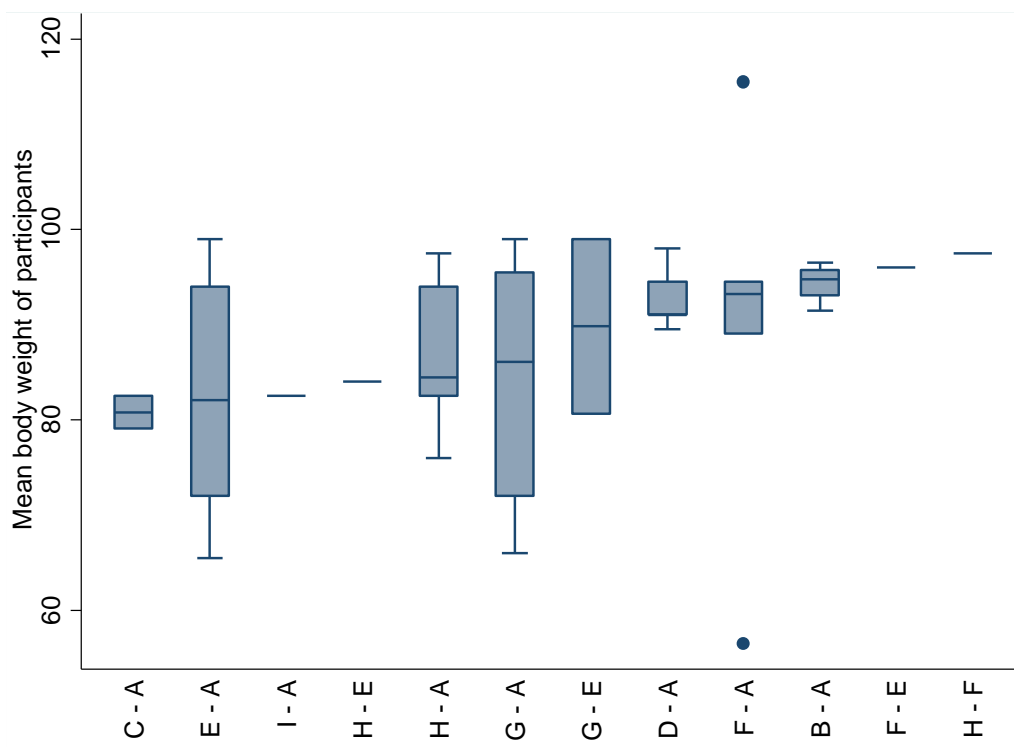

Supplementary Figure S4: Box plots showing the distribution of the mean body weight (kg) of the trials across the available direct comparisons.

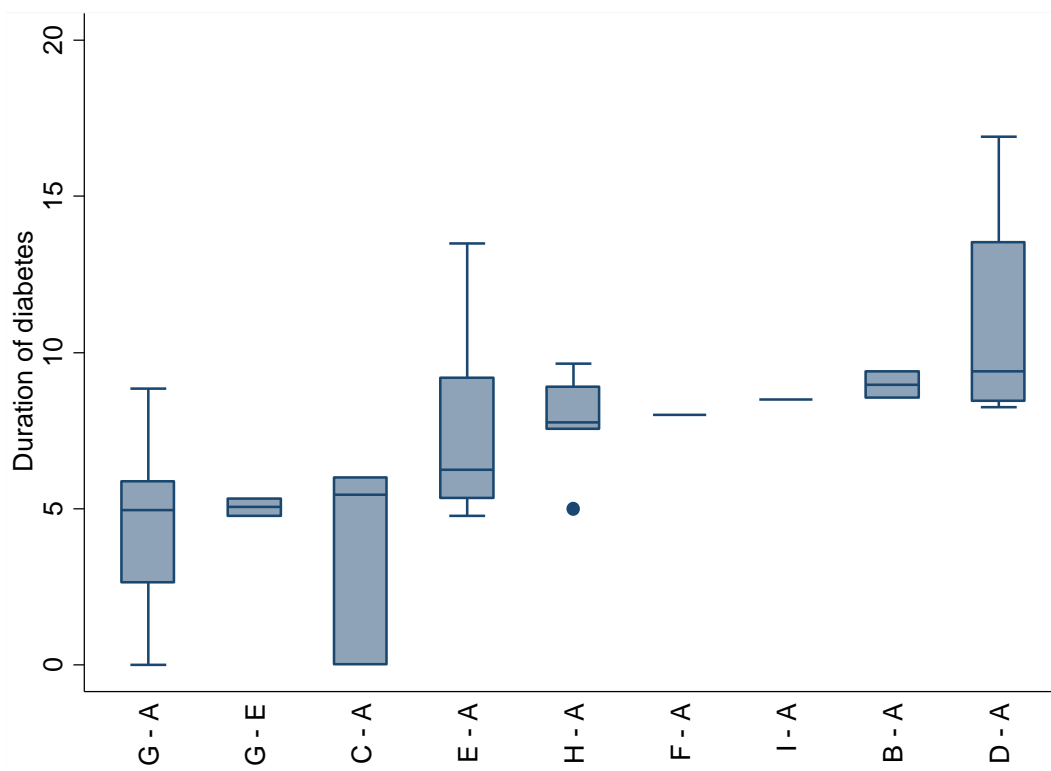

Supplementary Figure S5: Box plots showing the distribution of the mean duration of diabetes (years) in the trials across the available direct comparisons.

Electronic Supplementary Material

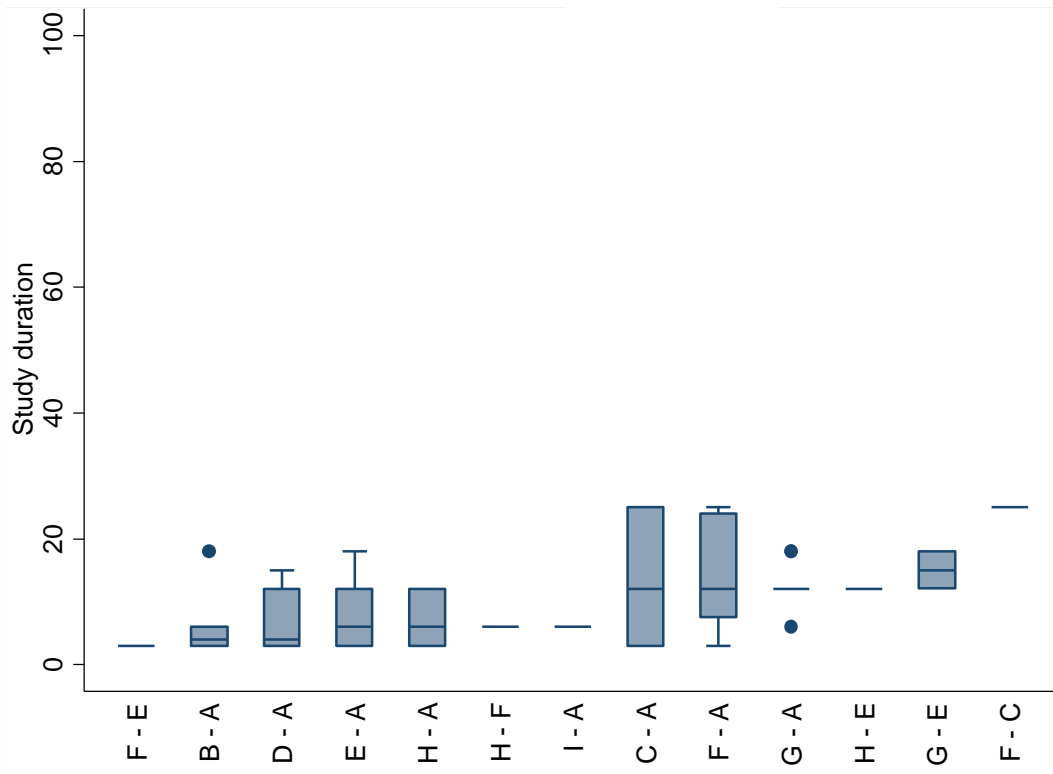

Supplementary Figure S6: Box plots showing the distribution of the trial duration (months) across the available direct comparisons.



# Electronic Supplementary Material

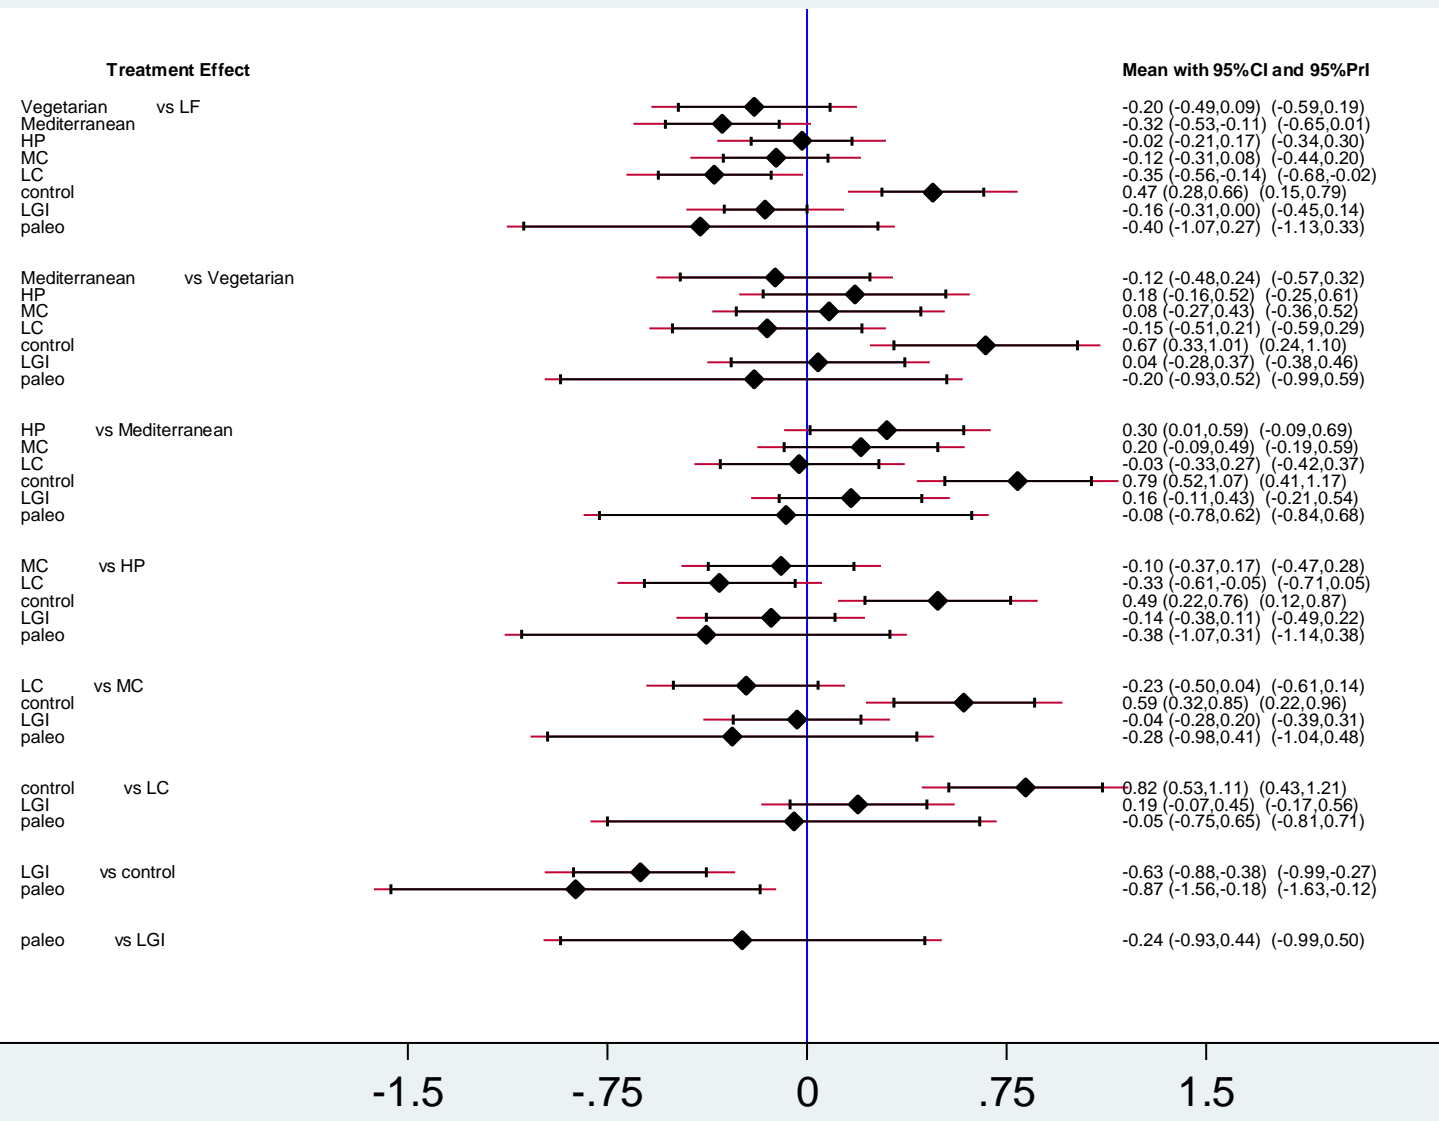

## Electronic Supplementary Material

Supplementary Figure S7: Mean differences (MD) for glycosylated haemoglobin (%) as estimated from network meta-analysis for every possible pair of interventions. Solid lines represent 95% Cis, and red lines 95% PrI.

HP=High-Protein, LC=Low-carbohydrate, LF=Low-fat, LGI=Low GI/GL, MC=Moderate-carbohydrate

# Electronic Supplementary Material

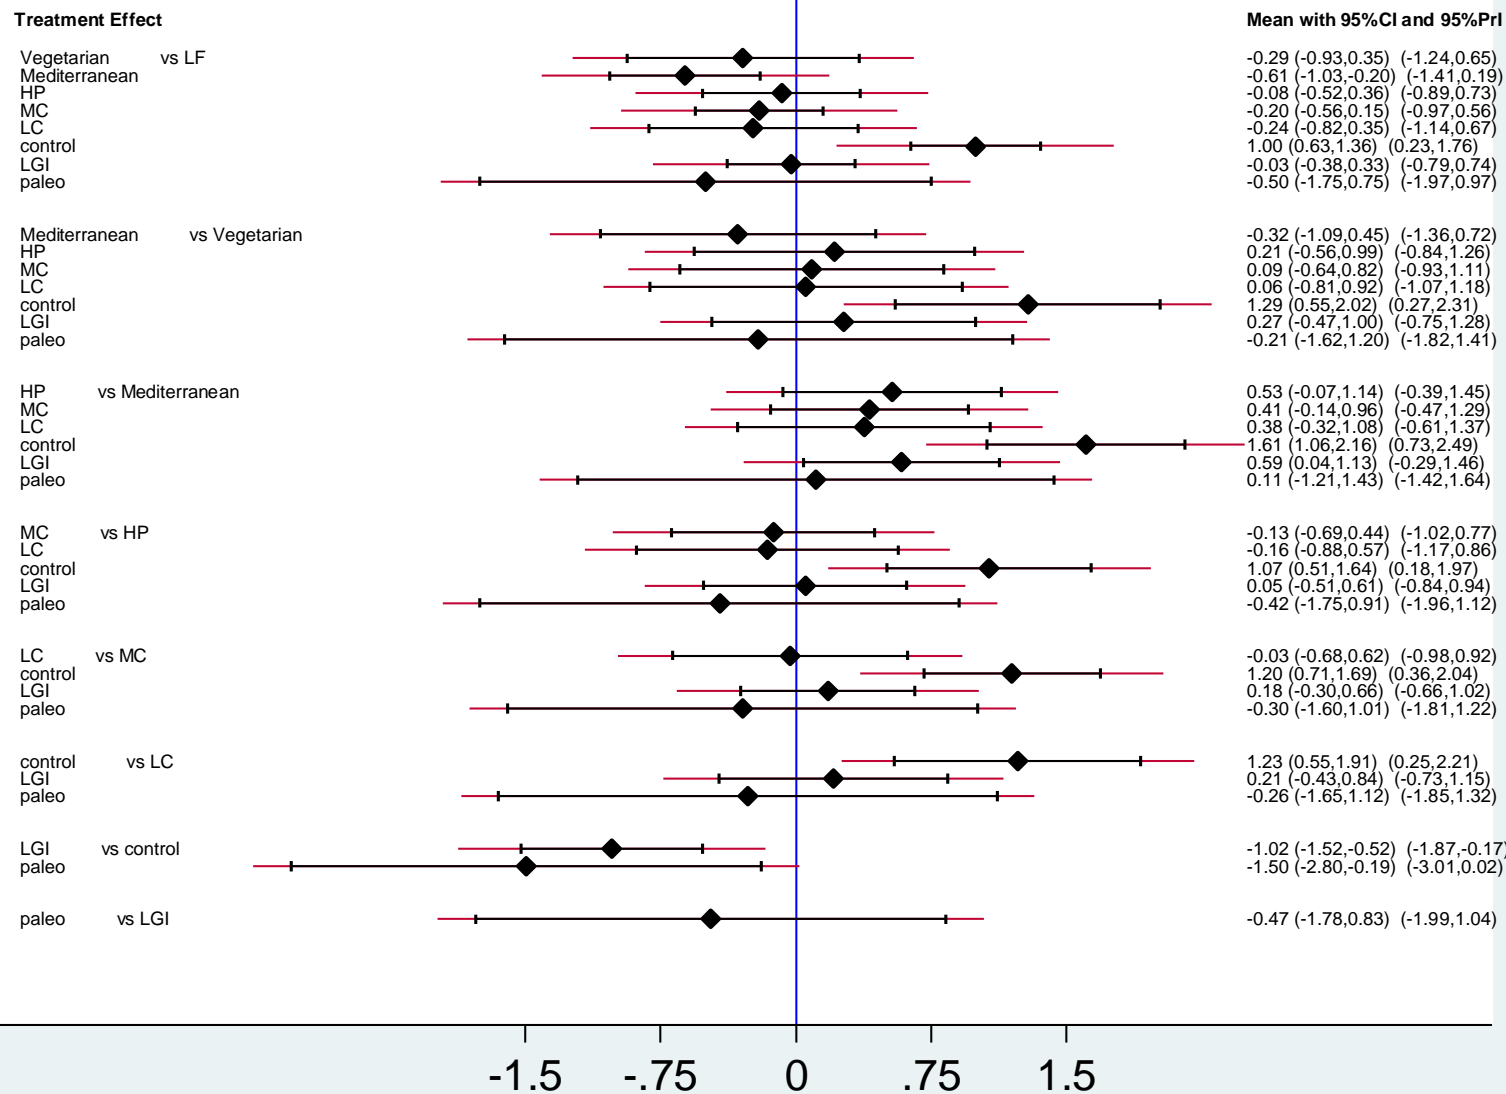

## Electronic Supplementary Material

Supplementary Figure S8: Mean differences (MD) for fasting glucose (mmol/l) as estimated from network meta-analysis for every possible pair of interventions. Solid lines represent 95% CrI, and red lines 95% PrI

HP=High-Protein, LC=Low-carbohydrate, LF=Low-fat, LGI=Low GI/GL, MC=Moderate-carbohydrate

Electronic Supplementary Material

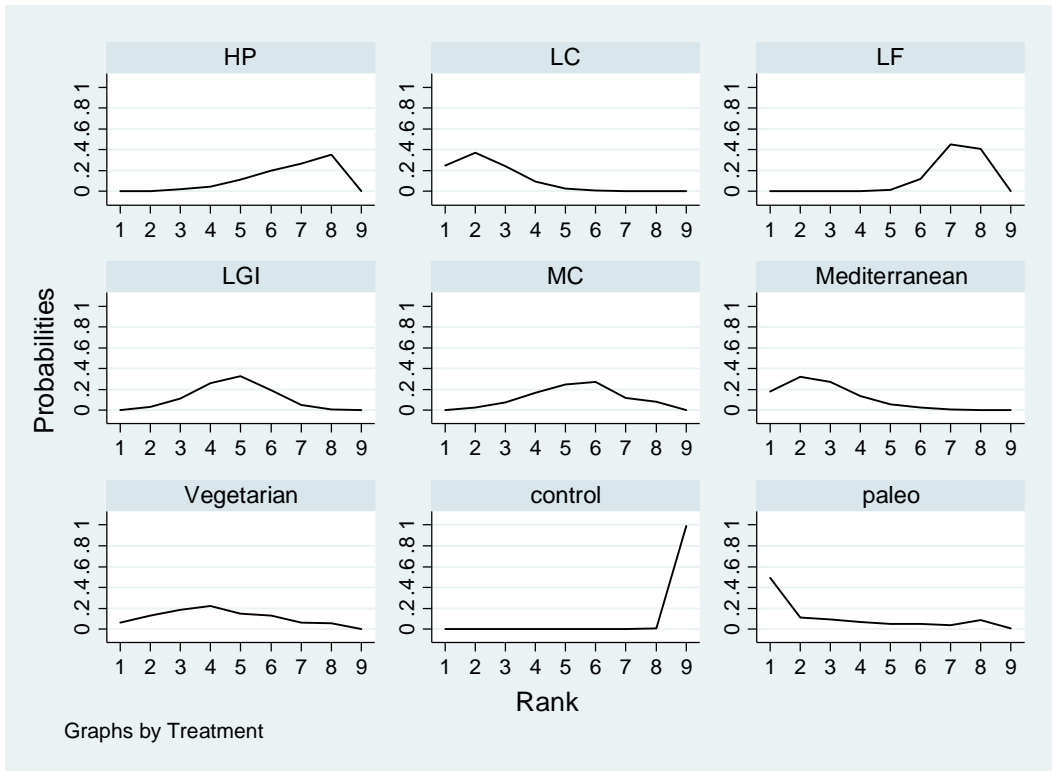

Supplementary Figure S9: Rankograms for HbA1c (%)

HP=High-Protein, LC=Low-carbohydrate, LF=Low-fat, LGI=Low GI/GL, MC=Moderate-carbohydrate

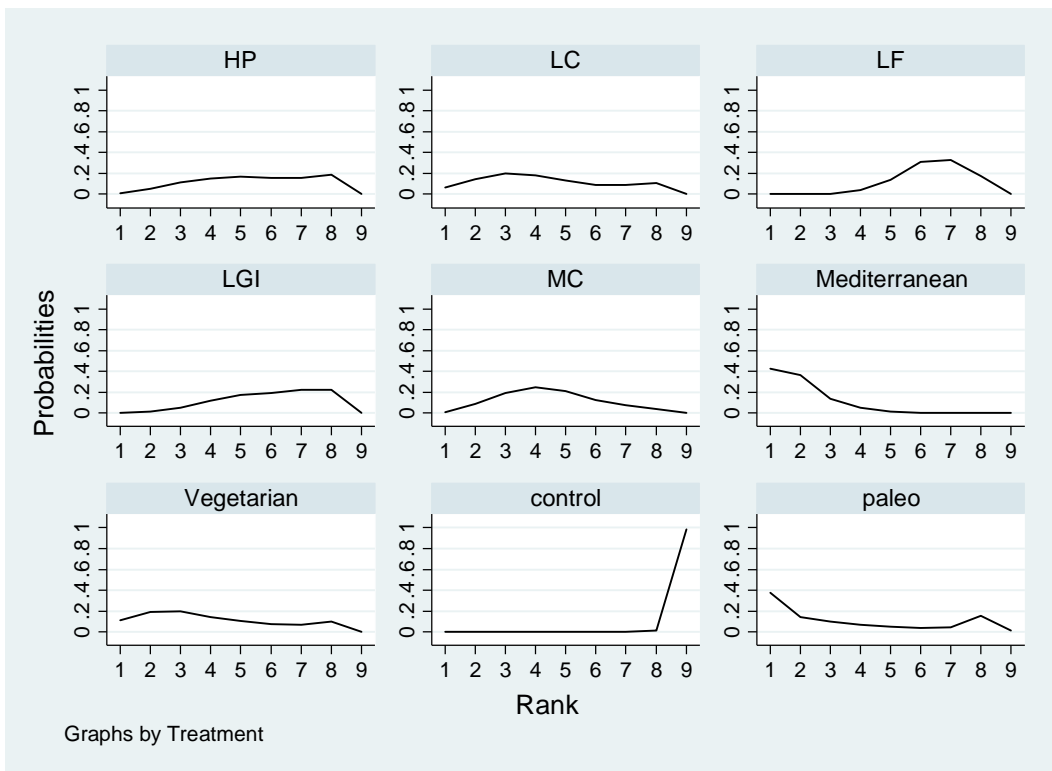

Supplementary Figure S10: Rankogram for fasting glucose (mmol/l)

## Electronic Supplementary Material

HP=High-Protein, LC=Low-carbohydrate, LF=Low-fat, LGI=Low GI/GL, MC=Moderate-carbohydrate

Electronic Supplementary Material

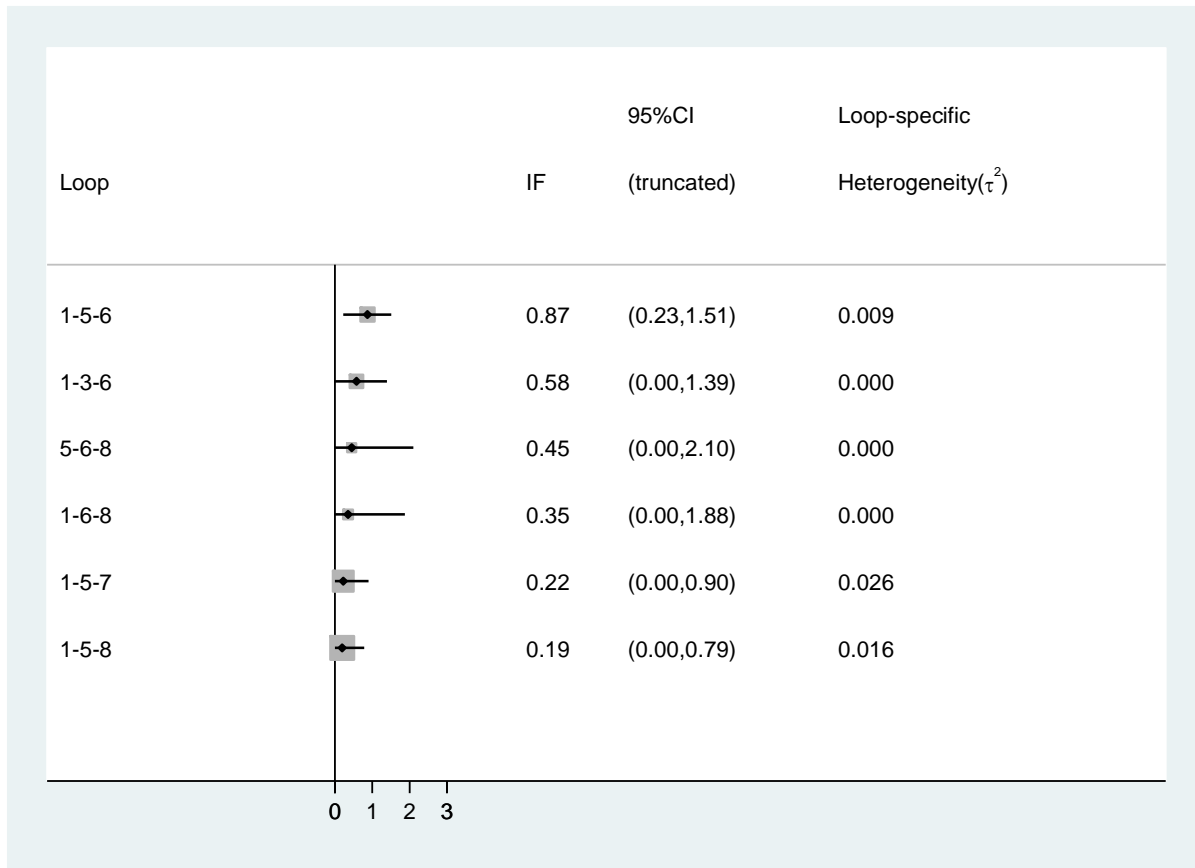

Supplementary Figure S11: Loop-specific approach for inconsistency for HbA1c

[1=Low-fat, 2=Vegetarian, 3=Mediterranean, 4=High-Protein, 5=Moderate-carbohydrate, 6=Low-carbohydrate, 7=control, 8=Low GI/GL, 9=Palaeolithic].

Electronic Supplementary Material

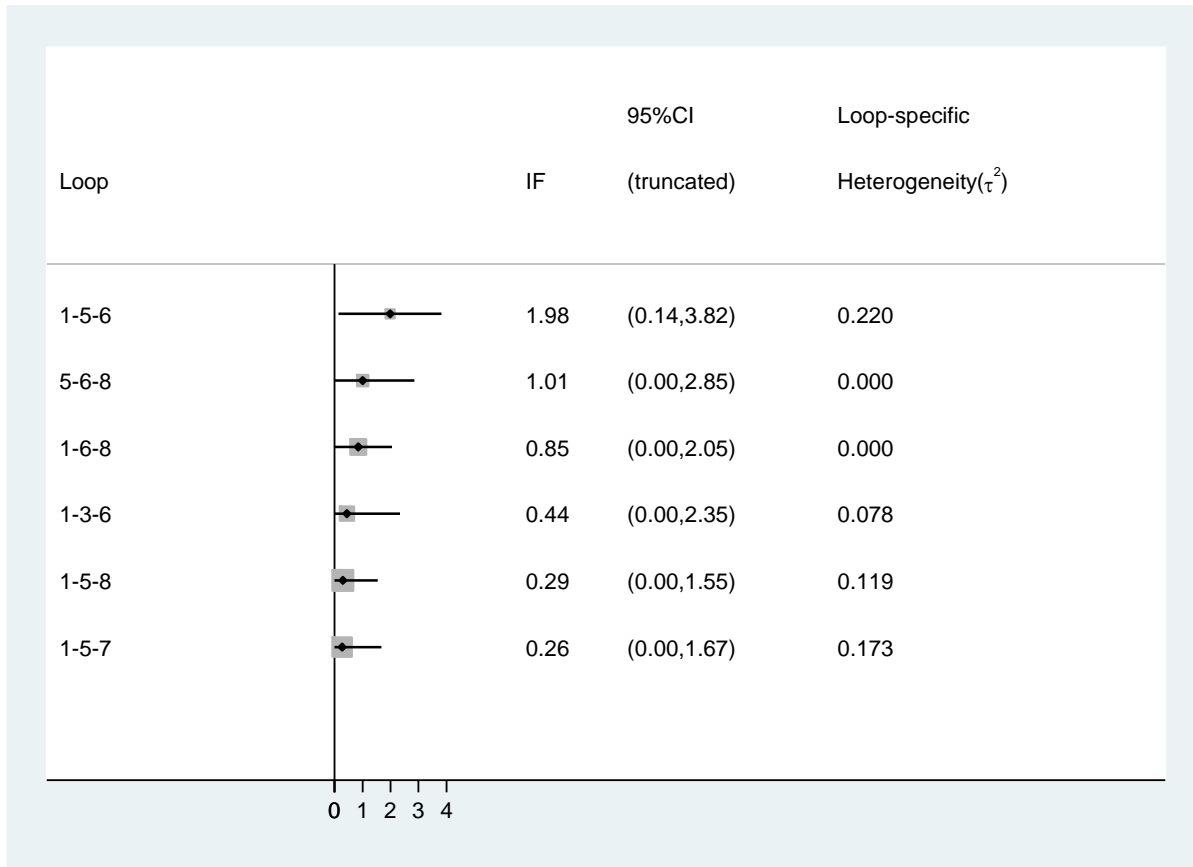

Supplementary Figure S12: Loop-specific approach for inconsistency for fasting glucose

[1=Low-fat, 2=Vegetarian, 3=Mediterranean, 4=High-Protein, 5=Moderate-carbohydrate, 6=Low-carbohydrate, 7=control, 8=Low GI/GL, 9=Palaeolithic].



Electronic Supplementary Material

| Side  | Direct    | Indirect  | Difference |           |           |           |       |
|-------|-----------|-----------|------------|-----------|-----------|-----------|-------|
|       | Coef.     | Std. Err. | Coef.      | Std. Err. | Coef.     | Std. Err. | P> z  |
| 1 3 * | -.3360849 | .1084342  | .2971034   | .7375321  | -.6331883 | .7487571  | 0.398 |
| 1 5   | -.1861283 | .1113727  | .1955237   | .2409221  | -.381652  | .2664811  | 0.152 |
| 1 6   | -.2134685 | .1091256  | -1.045446  | .2621847  | .8319771  | .286296   | 0.004 |
| 1 7 * | .4205536  | .0910826  | 1.401375   | .4463529  | -.9808214 | .4558512  | 0.031 |
| 1 8   | -.147641  | .078519   | -.4272755  | .4007604  | .2796344  | .4073853  | 0.492 |
| 3 6   | -.3959493 | .4068855  | .0277253   | .1582971  | -.4236747 | .4366692  | 0.332 |
| 5 6   | -.8999992 | .2840959  | -.0447772  | .1471216  | -.855222  | .3199301  | 0.008 |
| 5 7   | .9333773  | .2648388  | .4640484   | .1514136  | .4693288  | .3138661  | 0.135 |
| 5 8   | -.0595211 | .2472088  | -.0341048  | .1452736  | -.0254162 | .2877383  | 0.930 |
| 6 8   | .4099864  | .7807053  | .1854637   | .1335653  | .2245228  | .7920484  | 0.777 |

Supplementary Table S4: Side-splitting approach for inconsistency for HbA1c

[1=Low-fat, 2=Vegetarian, 3=Mediterranean, 4=High-Protein, 5=Moderate-carbohydrate, 6=Low-carbohydrate, 7=control, 8=Low GI/GL, 9=Palaeolithic].

Electronic Supplementary Material

| Side  | Direct    | Indirect  | Difference |           |           |           |       |
|-------|-----------|-----------|------------|-----------|-----------|-----------|-------|
|       | Coef.     | Std. Err. | Coef.      | Std. Err. | Coef.     | Std. Err. | P> z  |
| 1 3 * | -.6122477 | .2167232  | -.59068    | 1.818422  | -.0215677 | 1.838986  | 0.991 |
| 1 5   | -.2799723 | .1967195  | .413155    | .5633204  | -.6931273 | .5980085  | 0.246 |
| 1 6   | .2385932  | .3764301  | -.9191882  | .4522758  | 1.157781  | .5824865  | 0.047 |
| 1 7 * | .95863    | .1857425  | 2.089195   | 1.008676  | -1.130565 | 1.02482   | 0.270 |
| 1 8   | -.0285752 | .1930546  | .000853    | .5894406  | -.0294282 | .6200235  | 0.962 |
| 3 6   | .4784134  | .8622421  | .3553019   | .390742   | .1231116  | .9384489  | 0.896 |
| 5 6   | -1.459987 | .725599   | .3308306   | .3641646  | -1.790818 | .8118549  | 0.027 |
| 5 7   | 1.549413  | .569377   | 1.114961   | .2781715  | .4344523  | .6340549  | 0.493 |
| 5 8   | .1421199  | .5448269  | .1874224   | .2815729  | -.0453025 | .6141079  | 0.941 |
| 6 8   | .4999955  | .6085481  | .0940235   | .3849339  | .405972   | .7200736  | 0.573 |

Supplementary Table S5: Side-splitting approach for inconsistency for fasting glucose

[1=Low-fat, 2=Vegetarian, 3=Mediterranean, 4=High-Protein, 5=Moderate-carbohydrate, 6=Low-carbohydrate, 7=control, 8=Low GI/GL, 9=Palaeolithic].

Electronic Supplementary Material

| HbA1c (%) |                   |                    |                    |                    |                    |                     |                     |
|-----------|-------------------|--------------------|--------------------|--------------------|--------------------|---------------------|---------------------|
| Low-Carb  | 0.09 (-0.26,0.45) | -0.14 (-0.78,0.51) | -0.23 (-0.72,0.25) | -0.12 (-0.52,0.27) | -0.25 (-0.64,0.14) | -0.22 (-0.49,0.05)  | -0.75 (-1.10,-0.39) |
|           | Mediterranean     | -0.23 (-0.87,0.40) | -0.33 (-0.80,0.14) | -0.22 (-0.59,0.16) | -0.35 (-0.72,0.03) | -0.31 (-0.56,-0.06) | -0.84 (-1.15,-0.53) |
|           |                   | Vegetarian         | -0.10 (-0.81,0.61) | 0.01 (-0.64,0.67)  | -0.12 (-0.77,0.53) | -0.08 (-0.67,0.51)  | -0.61 (-1.23,0.02)  |
|           |                   |                    | Low-GI/GL          | 0.11 (-0.32,0.54)  | -0.02 (-0.51,0.47) | 0.02 (-0.38,0.42)   | -0.51 (-0.96,-0.06) |
|           |                   |                    |                    | Moderate-Carb      | -0.13 (-0.53,0.27) | -0.09 (-0.38,0.20)  | -0.62 (-0.95,-0.29) |
|           |                   |                    |                    |                    | High- Protein      | 0.04 (-0.24,0.32)   | -0.49 (-0.85,-0.13) |
|           |                   |                    |                    |                    |                    | Low-Fat             | -0.53 (-0.75,-0.31) |
|           |                   |                    |                    |                    |                    |                     | Control             |

Supplementary Table S6: League table: Long-term studies:  $\geq 12$  months. The values above the diet classes correspond to the difference in mean (95% CI) in HbA1c (%) between the row and columns (eg, the mean difference in average HbA1c between Low-Carb and Low-Fat diet is -0.22%)

Electronic Supplementary Material

| HbA1c (%) |                    |                    |                    |                    |                     |                     |                     |                     |
|-----------|--------------------|--------------------|--------------------|--------------------|---------------------|---------------------|---------------------|---------------------|
| Low-Carb  | -0.39 (-1.19,0.41) | -0.22 (-1.01,0.57) | -0.38 (-0.91,0.14) | -0.41 (-0.84,0.01) | -0.45 (-0.87,-0.04) | -0.54 (-1.02,-0.07) | -0.62 (-1.01,-0.23) | -0.82 (-1.49,-0.16) |
|           | Mediterranean      | 0.17 (-0.81,1.15)  | 0.01 (-0.77,0.79)  | -0.02 (-0.76,0.71) | -0.06 (-0.82,0.70)  | -0.15 (-0.90,0.60)  | -0.23 (-0.93,0.47)  | -0.43 (-1.31,0.45)  |
|           |                    | Palaeolithic       | -0.16 (-0.93,0.61) | -0.19 (-0.91,0.53) | -0.23 (-0.98,0.52)  | -0.32 (-1.06,0.42)  | -0.40 (-1.09,0.29)  | -0.60 (-1.47,0.27)  |
|           |                    |                    | Vegetarian         | -0.03 (-0.44,0.38) | -0.07 (-0.53,0.39)  | -0.16 (-0.60,0.29)  | -0.24 (-0.59,0.11)  | -0.44 (-1.08,0.20)  |
|           |                    |                    |                    | Low-GI/GL          | -0.04 (-0.40,0.32)  | -0.13 (-0.47,0.22)  | -0.21 (-0.43,0.01)  | -0.41 (-0.99,0.17)  |
|           |                    |                    |                    |                    | Moderate-Carb       | -0.09 (-0.50,0.32)  | -0.17 (-0.47,0.14)  | -0.37 (-0.99,0.25)  |
|           |                    |                    |                    |                    |                     | High-Protein        | -0.08 (-0.36,0.20)  | -0.28 (-0.89,0.33)  |
|           |                    |                    |                    |                    |                     |                     | Low-Fat             | -0.20 (-0.74,0.34)  |
|           |                    |                    |                    |                    |                     |                     |                     | Control             |

Supplementary Table S7: League table: Short-term studies: <12 months. The values above the diet classes correspond to the difference in mean (95% CI) in HbA1c (%) between the row and columns (eg, the mean difference in average HbA1c between Low-Carb and Low-Fat diet is -0.62%)

Electronic Supplementary Material

| HbA1c (%) |                   |                    |                    |                     |                     |                     |
|-----------|-------------------|--------------------|--------------------|---------------------|---------------------|---------------------|
| Low-Carb  | 0.27 (-0.09,0.62) | 0.01 (-0.31,0.34)  | 0.07 (-0.32,0.46)  | -0.19 (-0.60,0.23)  | -0.11 (-0.39,0.18)  | -0.57 (-0.92,-0.21) |
|           | Mediterranean     | -0.25 (-0.51,0.00) | -0.19 (-0.53,0.14) | -0.45 (-0.82,-0.09) | -0.37 (-0.59,-0.16) | -0.83 (-1.12,-0.54) |
|           |                   | Low-GI/GL          | 0.06 (-0.23,0.35)  | -0.20 (-0.53,0.13)  | -0.12 (-0.27,0.03)  | -0.58 (-0.83,-0.33) |
|           |                   |                    | Moderate-Carb      | -0.26 (-0.66,0.14)  | -0.18 (-0.44,0.08)  | -0.64 (-0.95,-0.33) |
|           |                   |                    |                    | High-Protein        | 0.08 (-0.22,0.38)   | -0.38 (-0.74,-0.02) |
|           |                   |                    |                    |                     | Low-Fat             | -0.46 (-0.67,-0.25) |
|           |                   |                    |                    |                     |                     | Control             |

Supplementary Table S8: League table: Studies with sample size:  $\geq 100$ . The values above the diet classes correspond to the difference in mean (95% CI) in HbA1c (%) between the row and columns (eg, the mean difference in average HbA1c between Low-Carb and Low-Fat diet is -0.11%)

Electronic Supplementary Material

| HbA1c (%) |                    |                    |                    |                    |                        |                        |                        |                        |
|-----------|--------------------|--------------------|--------------------|--------------------|------------------------|------------------------|------------------------|------------------------|
| Low-Carb  | -0.37 (-0.86,0.11) | -0.17 (-0.89,0.54) | -0.37 (-0.78,0.03) | -0.09 (-0.60,0.42) | -0.47<br>(-0.82,-0.12) | -0.50<br>(-0.87,-0.12) | -0.57<br>(-0.87,-0.27) | -1.08<br>(-1.48,-0.67) |
|           | Mediterranean      | 0.20 (-0.58,0.98)  | 0.00 (-0.51,0.52)  | 0.28 (-0.32,0.89)  | -0.10<br>(-0.60,0.41)  | -0.12<br>(-0.61,0.37)  | -0.20<br>(-0.63,0.24)  | -0.70<br>(-1.22,-0.19) |
|           |                    | Palaeolithic       | -0.20 (-0.91,0.51) | 0.08 (-0.70,0.86)  | -0.30<br>(-1.01,0.41)  | -0.33<br>(-1.02,0.36)  | -0.40<br>(-1.05,0.25)  | -0.91<br>(-1.61,-0.20) |
|           |                    |                    | Vegetarian         | 0.28 (-0.23,0.79)  | -0.10<br>(-0.49,0.29)  | -0.13<br>(-0.49,0.24)  | -0.20<br>(-0.48,0.08)  | -0.70<br>(-1.09,-0.32) |
|           |                    |                    |                    | Low-GI/GL          | -0.38<br>(-0.89,0.13)  | -0.40<br>(-0.89,0.08)  | -0.48<br>(-0.90,-0.05) | -0.98<br>(-1.49,-0.48) |
|           |                    |                    |                    |                    | Moderate-Carb          | -0.03<br>(-0.39,0.33)  | -0.10<br>(-0.38,0.18)  | -0.61<br>(-1.00,-0.21) |
|           |                    |                    |                    |                    |                        | High-Protein           | -0.07<br>(-0.30,0.16)  | -0.58<br>(-0.94,-0.22) |
|           |                    |                    |                    |                    |                        |                        | Low-Fat                | -0.51<br>(-0.78,-0.23) |
|           |                    |                    |                    |                    |                        |                        |                        | Control                |

Supplementary Table S9: League table: Studies with sample size: <100. The values above the diet classes correspond to the difference in mean (95% CI) in HbA1c (%) between the row and columns (eg, the mean difference in average HbA1c between Low-Carb and Low-Fat diet is -0.57%)

Electronic Supplementary Material

| HbA1c (%) |                    |                    |                    |                     |                     |                     |                     |
|-----------|--------------------|--------------------|--------------------|---------------------|---------------------|---------------------|---------------------|
| Low-Carb  | -0.61 (-1.70,0.49) | -0.41 (-1.38,0.56) | -0.63 (-1.34,0.07) | -0.76 (-1.35,-0.17) | -0.82 (-1.57,-0.07) | -0.81 (-1.48,-0.14) | -1.23 (-1.97,-0.49) |
|           | Mediterranean      | 0.20 (-0.91,1.31)  | -0.03 (-0.94,0.89) | -0.15 (-1.10,0.79)  | -0.21 (-1.14,0.71)  | -0.20 (-1.06,0.66)  | -0.62 (-1.55,0.30)  |
|           |                    | Palaeolithic       | -0.23 (-1.00,0.54) | -0.35 (-1.15,0.45)  | -0.41 (-1.19,0.36)  | -0.40 (-1.10,0.30)  | -0.82 (-1.60,-0.05) |
|           |                    |                    | Low GI/GL          | -0.13 (-0.56,0.30)  | -0.19 (-0.64,0.27)  | -0.17 (-0.49,0.14)  | -0.60 (-1.06,-0.14) |
|           |                    |                    |                    | Moderate-Carb       | -0.06 (-0.57,0.45)  | -0.05 (-0.43,0.34)  | -0.47 (-0.99,0.05)  |
|           |                    |                    |                    |                     | High- Protein       | 0.01 (-0.32,0.35)   | -0.41 (-0.88,0.06)  |
|           |                    |                    |                    |                     |                     | Low-Fat             | -0.42 (-0.75,-0.09) |
|           |                    |                    |                    |                     |                     |                     | Control             |

Supplementary Table S10: League table: Studies mean age:  $\geq 60$  years of age. The values above the diet classes correspond to the difference in mean (95% CI) in HbA1c (%) between the row and columns (eg, the mean difference in average HbA1c between Low-Carb and Low-Fat diet is -0.81%)

Electronic Supplementary Material

| HbA1c (%) |                   |                    |                     |                    |                     |                     |                     |
|-----------|-------------------|--------------------|---------------------|--------------------|---------------------|---------------------|---------------------|
| Low Carb  | 0.18 (-0.07,0.43) | -0.00 (-0.34,0.33) | -0.06 (-0.30,0.18)  | 0.08 (-0.24,0.40)  | -0.18 (-0.47,0.12)  | -0.20 (-0.41,0.01)  | -0.70 (-1.01,-0.39) |
|           | Mediterranean     | -0.18 (-0.48,0.11) | -0.24 (-0.40,-0.08) | -0.10 (-0.37,0.17) | -0.36 (-0.61,-0.10) | -0.38 (-0.52,-0.24) | -0.88 (-1.14,-0.62) |
|           |                   | Vegetarian         | -0.06 (-0.34,0.22)  | 0.09 (-0.27,0.44)  | -0.17 (-0.51,0.16)  | -0.20 (-0.46,0.06)  | -0.70 (-1.04,-0.35) |
|           |                   |                    | Low-GI/GL           | 0.14 (-0.11,0.40)  | -0.12 (-0.36,0.13)  | -0.14 (-0.25,-0.04) | -0.64 (-0.88,-0.39) |
|           |                   |                    |                     | Moderate-Carb      | -0.26 (-0.58,0.06)  | -0.29 (-0.53,-0.05) | -0.78 (-1.08,-0.49) |
|           |                   |                    |                     |                    | High-Protein        | -0.03 (-0.24,0.18)  | -0.52 (-0.83,-0.21) |
|           |                   |                    |                     |                    |                     | Low-Fat             | -0.50 (-0.72,-0.27) |
|           |                   |                    |                     |                    |                     |                     | Control             |

Supplementary Table S11: League table: Studies mean age: <60 years of age. The values above the diet classes correspond to the difference in mean (95% CI) in HbA1c (%) between the row and columns (eg, the mean difference in average HbA1c between Low-Carb and Low-Fat diet is -0.20%)



Electronic Supplementary Material

| HbA1c (%)                |                        |                       |                       |                       |                        |                        |                        |                        |
|--------------------------|------------------------|-----------------------|-----------------------|-----------------------|------------------------|------------------------|------------------------|------------------------|
| Low-Carb                 | -0.14<br>(-0.57,0.29)  | -0.07<br>(-0.83,0.70) | -0.37<br>(-1.01,0.27) | -0.36<br>(-0.72,0.01) | -0.32<br>(-0.69,0.05)  | -0.55<br>(-1.02,-0.08) | -0.47<br>(-0.78,-0.15) | -0.81<br>(-1.21,-0.41) |
| 0.18<br>(-0.80,1.16)     | Mediterranen           | 0.07<br>(-0.69,0.83)  | -0.23<br>(-0.87,0.41) | -0.22<br>(-0.58,0.15) | -0.18<br>(-0.59,0.23)  | -0.41<br>(-0.87,0.06)  | -0.33<br>(-0.64,-0.02) | -0.67<br>(-1.06,-0.28) |
| 0.13<br>(-1.54,1.81)     | -0.05<br>(-1.70,1.61)  | Palaeolithic          | -0.30<br>(-1.19,0.59) | -0.29<br>(-1.01,0.44) | -0.25<br>(-1.00,0.50)  | -0.48<br>(-1.26,0.30)  | -0.40<br>(-1.10,0.30)  | -0.74<br>(-1.48,-0.00) |
| -0.31<br>(-1.82,1.21)    | -0.49<br>(-1.98,1.00)  | -0.44<br>(-2.43,1.55) | Vegetarian            | 0.01<br>(-0.58,0.60)  | 0.05<br>(-0.57,0.67)   | -0.18<br>(-0.83,0.48)  | -0.10<br>(-0.66,0.46)  | -0.44<br>(-1.05,0.17)  |
| -0.33<br>(-1.16,0.50)    | -0.51<br>(-1.38,0.37)  | -0.46<br>(-2.05,1.13) | -0.02<br>(-1.44,1.40) | Low-GI/GL             | 0.04<br>(-0.28,0.36)   | -0.19<br>(-0.59,0.21)  | -0.11<br>(-0.31,0.08)  | -0.46<br>(-0.77,-0.15) |
| 0.12<br>(-0.80,1.03)     | -0.06<br>(-1.04,0.91)  | -0.02<br>(-1.66,1.63) | 0.42<br>(-1.06,1.91)  | 0.45<br>(-0.36,1.25)  | Moderate-Carb          | -0.23<br>(-0.67,0.21)  | -0.15<br>(-0.43,0.12)  | -0.49<br>(-0.84,-0.15) |
| -0.57<br>(-2.00,0.87)    | -0.75<br>(-2.16,0.66)  | -0.70<br>(-2.63,1.23) | -0.26<br>(-2.05,1.53) | -0.24<br>(-1.57,1.09) | -0.68<br>(-2.09,0.72)  | High-Protein           | 0.08<br>(-0.27,0.42)   | -0.26<br>(-0.69,0.16)  |
| -0.37<br>(-1.12,0.38)    | -0.55<br>(-1.25,0.16)  | -0.50<br>(-2.00,1.00) | -0.06<br>(-1.37,1.25) | -0.04<br>(-0.57,0.49) | -0.48<br>(-1.17,0.21)  | 0.20<br>(-1.02,1.42)   | Low-Fat                | -0.34<br>(-0.59,-0.10) |
| -1.07<br>(-2.04,-0.09)   | -1.24<br>(-2.20,-0.29) | -1.20<br>(-2.83,0.43) | -0.76<br>(-2.22,0.71) | -0.74<br>(-1.57,0.09) | -1.18<br>(-2.05,-0.31) | -0.50<br>(-1.88,0.89)  | -0.70<br>(-1.35,-0.05) | Control                |
| Fasting glucose (mmol/l) |                        |                       |                       |                       |                        |                        |                        |                        |

Table S12: League table: Low risk of bias studies. The values above the diet classes correspond to the difference in mean (95% CI) in HbA1c (%) between the row and columns (eg, the mean difference in average HbA1c between Low-Carb and Low-Fat diet is -0.47%) The value below the diet classes correspond to the

## Electronic Supplementary Material

difference in mean in fasting glucose (mmol/l) between the column and the row (eg, the mean difference in average fasting glucose between Low-Carb and Low-Fat diet is -0.37 mmol/l)

Electronic Supplementary Material

| HbA1c (%)                |                        |                        |                        |                        |                        |                        |                        |                        |
|--------------------------|------------------------|------------------------|------------------------|------------------------|------------------------|------------------------|------------------------|------------------------|
| Low-Carb                 | -0.08<br>(-0.41,0.25)  | -0.01<br>(-0.72,0.71)  | -0.21<br>(-0.60,0.19)  | -0.29<br>(-0.58,0.01)  | -0.29<br>(-0.58,0.01)  | -0.39<br>(-0.72,-0.07) | -0.41<br>(-0.66,-0.15) | -0.41<br>(-0.66,-0.15) |
| 0.33<br>(-0.42,1.07)     | Mediterranen           | 0.07<br>(-0.63,0.78)   | -0.13<br>(-0.50,0.24)  | -0.21<br>(-0.48,0.06)  | -0.21<br>(-0.50,0.09)  | -0.32<br>(-0.62,-0.01) | -0.33<br>(-0.55,-0.11) | -0.80<br>(-1.08,-0.52) |
| 0.21<br>(-1.20,1.63)     | -0.11<br>(-1.45,1.23)  | Palaeolithic           | -0.20<br>(-0.93,0.53)  | -0.28<br>(-0.97,0.41)  | -0.28<br>(-0.98,0.42)  | -0.39<br>(-1.09,0.31)  | -0.40<br>(-1.07,0.27)  | -0.87<br>(-1.57,-0.18) |
| 0.01<br>(-0.90,0.91)     | -0.32<br>(-1.10,0.46)  | -0.21<br>(-1.63,1.22)  | Vegetarian             | -0.08<br>(-0.42,0.26)  | -0.08<br>(-0.44,0.28)  | -0.19<br>(-0.55,0.18)  | -0.20<br>(-0.50,0.10)  | -0.67<br>(-1.03,-0.32) |
| -0.28<br>(-0.96,0.40)    | -0.60<br>(-1.17,-0.04) | -0.49<br>(-1.82,0.83)  | -0.29<br>(-1.04,0.46)  | Low-GI/GL              | 0.00<br>(-0.25,0.25)   | -0.11<br>(-0.37,0.15)  | -0.12<br>(-0.28,0.04)  | -0.59<br>(-0.85,-0.34) |
| -0.08<br>(-0.77,0.61)    | -0.41<br>(-0.96,0.15)  | -0.29<br>(-1.61,1.03)  | -0.09<br>(-0.83,0.65)  | 0.20<br>(-0.30,0.70)   | Moderate-Carb          | -0.11<br>(-0.39,0.18)  | -0.12<br>(-0.32,0.08)  | -0.59<br>(-0.86,-0.33) |
| -0.20<br>(-0.98,0.58)    | -0.53<br>(-1.15,0.10)  | -0.42<br>(-1.76,0.93)  | -0.21<br>(-1.00,0.58)  | 0.08<br>(-0.52,0.67)   | -0.12<br>(-0.70,0.46)  | High-Protein           | -0.01<br>(-0.22,0.19)  | -0.49<br>(-0.77,-0.20) |
| -0.29<br>(-0.92,0.35)    | -0.61<br>(-1.04,-0.18) | -0.50<br>(-1.77,0.77)  | -0.29<br>(-0.94,0.36)  | -0.01<br>(-0.38,0.37)  | -0.21<br>(-0.57,0.16)  | -0.08<br>(-0.54,0.37)  | Low-Fat                | -0.47<br>(-0.67,-0.28) |
| -1.28<br>(-2.01,-0.55)   | -1.61<br>(-2.17,-1.04) | -1.50<br>(-2.82,-0.17) | -1.29<br>(-2.04,-0.54) | -1.00<br>(-1.53,-0.48) | -1.20<br>(-1.70,-0.70) | -1.08<br>(-1.67,-0.49) | -1.00<br>(-1.36,-0.63) | Control                |
| Fasting glucose (mmol/l) |                        |                        |                        |                        |                        |                        |                        |                        |

Table S13: League table: High risk of bias trials excluded. The values above the diet classes correspond to the difference in mean (95% CI) in HbA1c (%) between the row and columns (eg, the mean difference in average HbA1c between Low-Carb and Low-Fat diet is -0.41%) The value below the diet classes

## Electronic Supplementary Material

correspond to the difference in mean in fasting glucose (mmol/l) between the column and the row (eg, the mean difference in average fasting glucose between Low-Carb and Low-Fat diet is -0.29 mmol/l)

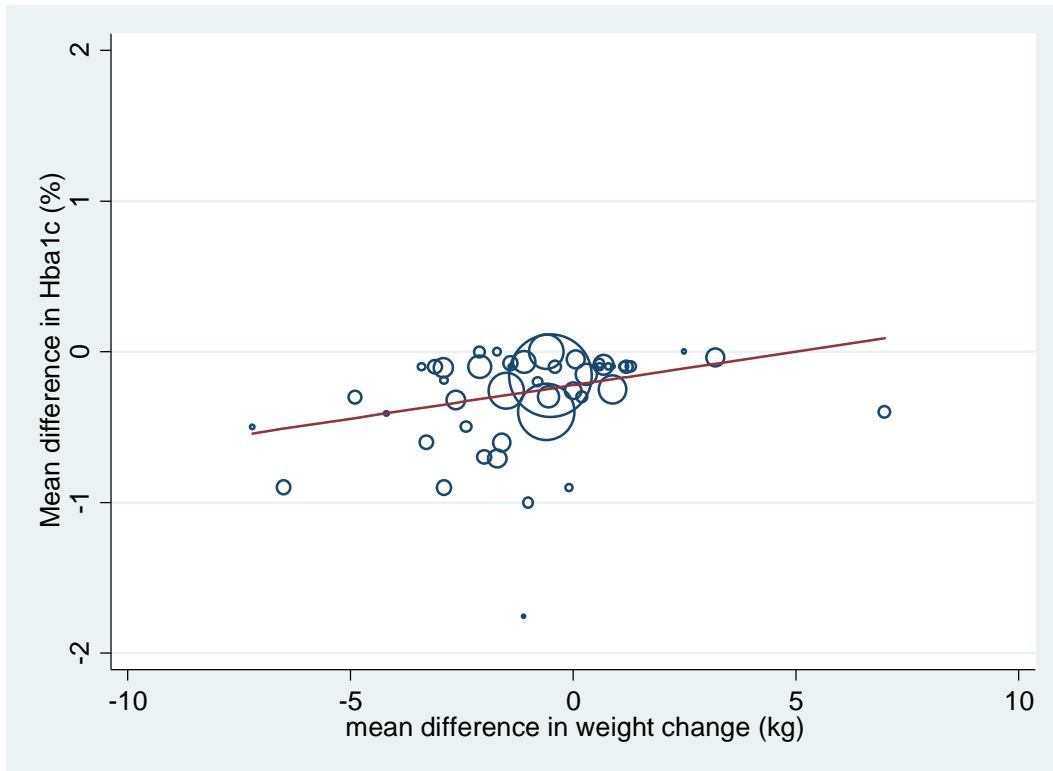

Supplementary Figure S13: Meta-regression showing the association between mean differences in HbA1c (%) and mean difference in weight change between dietary approaches

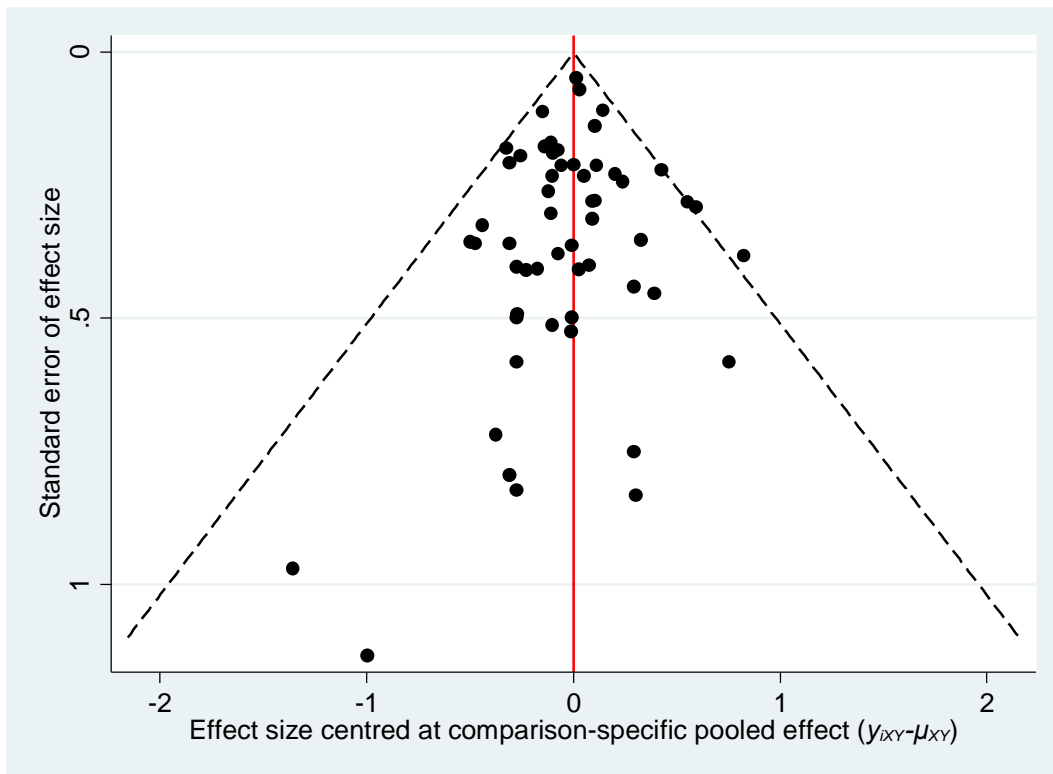

Supplementary Figure S14: Comparison-adjusted funnel plot for HbA1c involving all studies comparing all low-fat diets vs. all other dietary approaches.

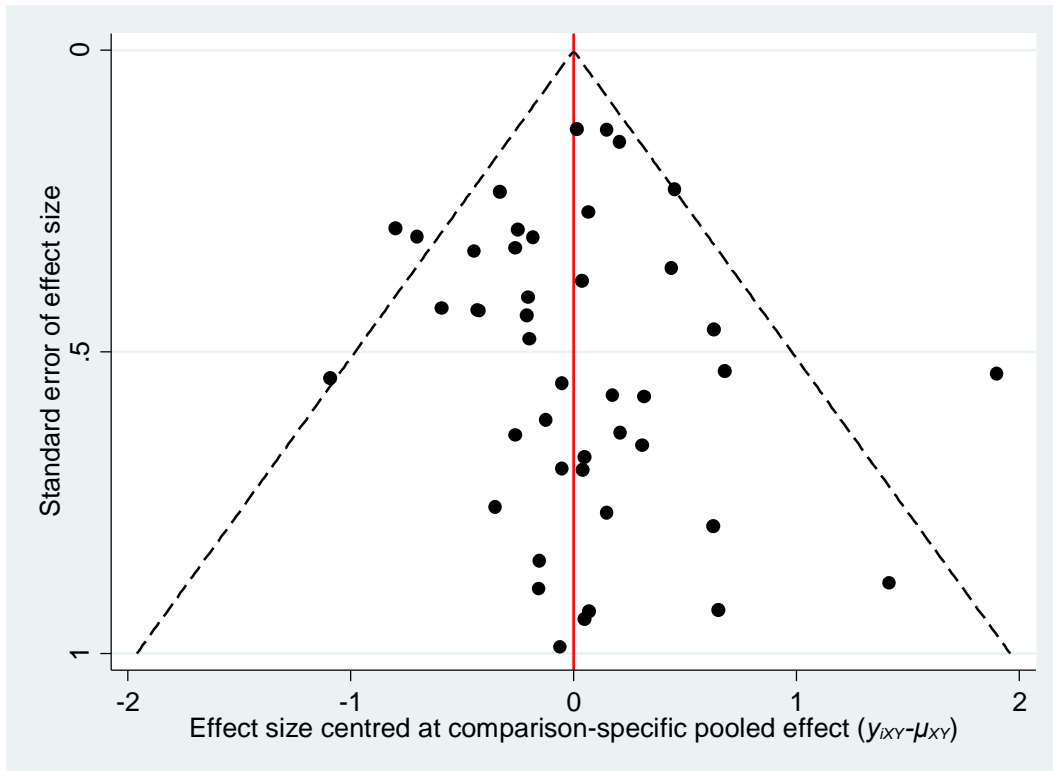

Supplementary Figure S15: Comparison-adjusted funnel plot for fasting glucose involving all studies comparing a low fat diet vs. all other approaches

Electronic Supplementary Material

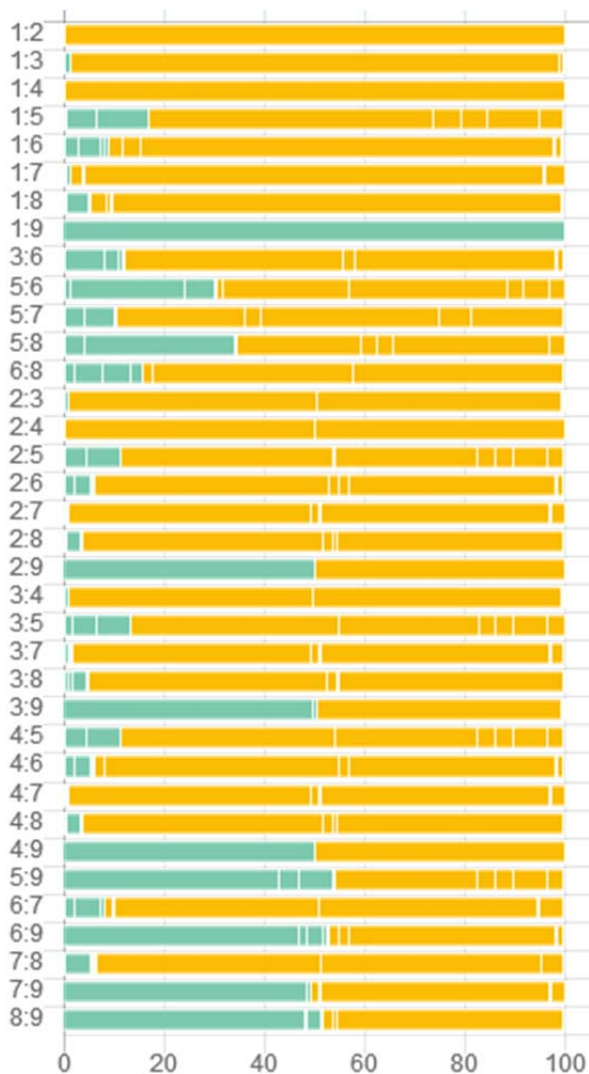

Supplementary Figure S16: Bar-graph showing for every comparison the percentage of information coming from low (green), moderate (yellow) and high (red) risk of bias studies [1=Low-fat, 2=Vegetarian, 3=Mediterranean, 4=High-Protein, 5=Moderate-carbohydrate, 6=Low-carbohydrate, 7=control, 8=Low GI/GL, 9=Palaeolithic].



## Electronic Supplementary Material

### Supplementary Appendix S2:

We evaluated the credibility of the evidence from network meta-analysis based on the approach suggested by Salanti G et al. Evaluating the quality of evidence from a network meta-analysis. *PloS One*. 2014;9(7):e99682 that extends the GRADE system into network meta-analysis.

To evaluate study limitations we used the online tool CiNeMA available from <http://ec2-52-28-232-32.eu-central-1.compute.amazonaws.com:8004/ocpu/library/contribution/www/> that combines the contribution of each direct comparison to the estimation (see Chaimani et al. Graphical tools for network meta-analysis in Stata. *Plos One* 2013 and Krahn et al. A graphical tool for locating inconsistency in network meta-analyses. *BMC Med Res Methodol* 2013) with the risk of bias assessments for each direct comparison and produces a bar-graph (Supplementary Figure 16). The bar-graph shows for the network estimate of every pairwise comparison how much information comes from low (green), moderate (yellow) or high (red) risk of bias studies.

Below we present our GRADE evaluation for the primary outcome and all comparisons between the different dietary approaches.

| Comparison | Risk of bias        | Indirectness     | Inconsistency         | Imprecision         | Publications bias | Rating   |
|------------|---------------------|------------------|-----------------------|---------------------|-------------------|----------|
| 1:2        | Serious concerns    | Serious concerns | No serious concerns   | Serious concerns    | Serious concerns  | Low      |
| 1:3        | Serious concerns    | Serious concerns | Very serious concerns | No serious concerns | Serious concerns  | Very low |
| 1:4        | Serious concerns    | Serious concerns | No serious concerns   | Serious concerns    | Serious concerns  | Low      |
| 1:5        | Serious concerns    | Serious concerns | Serious concerns      | Serious concerns    | Serious concerns  | Low      |
| 1:6        | Serious concerns    | Serious concerns | Very serious concerns | No serious concerns | Serious concerns  | Very low |
| 1:7        | Serious concerns    | Serious concerns | Serious concerns      | No serious concerns | Serious concerns  | Low      |
| 1:8        | Serious concerns    | Serious concerns | Very serious concerns | Serious concerns    | Serious concerns  | Very low |
| 1:9        | No serious concerns | Serious concerns | No serious concerns   | Serious concerns    | Serious concerns  | Moderate |
| 3:6        | Serious concerns    | Serious concerns | Serious concerns      | Serious concerns    | Serious concerns  | Low      |
| 5:6        | Serious concerns    | Serious concerns | Very serious concerns | Serious concerns    | Serious concerns  | Very low |
| 5:7        | Serious concerns    | Serious concerns | Serious concerns      | No serious concerns | Serious concerns  | Low      |
| 5:8        | Serious concerns    | Serious concerns | Serious concerns      | Serious concerns    | Serious concerns  | Low      |
| 6:8        | Serious concerns    | Serious concerns | Serious concerns      | Serious concerns    | Serious concerns  | Low      |
| 2:3        | Serious concerns    | Serious concerns | Serious concerns      | Serious concerns    | Serious concerns  | Low      |
| 2:4        | Serious concerns    | Serious concerns | Serious concerns      | Serious concerns    | Serious concerns  | Low      |
| 2:5        | Serious concerns    | Serious concerns | Serious concerns      | Serious concerns    | Serious concerns  | Low      |
| 2:6        | Serious concerns    | Serious concerns | Serious concerns      | Serious concerns    | Serious concerns  | Low      |

## Electronic Supplementary Material

|     |                     |                  |                       |                     |                  |          |
|-----|---------------------|------------------|-----------------------|---------------------|------------------|----------|
| 2:7 | Serious concerns    | Serious concerns | Serious concerns      | No serious concerns | Serious concerns | Low      |
| 2:8 | Serious concerns    | Serious concerns | Serious concerns      | Serious concerns    | Serious concerns | Low      |
| 2:9 | Serious concerns    | Serious concerns | Serious concerns      | Serious concerns    | Serious concerns | Low      |
| 3:4 | Serious concerns    | Serious concerns | Very serious concerns | No serious concerns | Serious concerns | Very low |
| 3:5 | Serious concerns    | Serious concerns | Serious concerns      | Serious concerns    | Serious concerns | Low      |
| 3:7 | Serious concerns    | Serious concerns | Serious concerns      | No serious concerns | Serious concerns | Low      |
| 3:8 | Serious concerns    | Serious concerns | Serious concerns      | No serious concerns | Serious concerns | Low      |
| 3:9 | No serious concerns | Serious concerns | Serious concerns      | Serious concerns    | Serious concerns | Moderate |
| 4:5 | Serious concerns    | Serious concerns | Serious concerns      | Serious concerns    | Serious concerns | Low      |
| 4:6 | Serious concerns    | Serious concerns | Very serious concerns | Serious concerns    | Serious concerns | Very low |
| 4:7 | Serious concerns    | Serious concerns | Serious concerns      | No serious concerns | Serious concerns | Low      |
| 4:8 | Serious concerns    | Serious concerns | Serious concerns      | Serious concerns    | Serious concerns | Low      |
| 4:9 | Serious concerns    | Serious concerns | Serious concerns      | Serious concerns    | Serious concerns | Low      |
| 5:9 | No serious concerns | Serious concerns | Serious concerns      | Serious concerns    | Serious concerns | Moderate |
| 6:7 | Serious concerns    | Serious concerns | Serious concerns      | Serious concerns    | Serious concerns | Low      |
| 6:9 | No serious concerns | Serious concerns | Serious concerns      | Serious concerns    | Serious concerns | Moderate |
| 7:8 | Serious concerns    | Serious concerns | Serious concerns      | No serious concerns | Serious concerns | Low      |
| 8:9 | Serious concerns    | Serious concerns | Serious concerns      | No serious concerns | Serious concerns | Low      |
| 8:9 | No serious concerns | Serious concerns | Serious concerns      | Serious concerns    | Serious concerns | Moderate |

[1=Low-fat, 2=Vegetarian, 3=Mediterranean, 4=High-Protein, 5=Moderate-carbohydrate, 6=Low-carbohydrate, 7=control, 8=Low GI/GL, 9=Palaeolithic].

**Supplementary References of excluded studies**

1. Argiana V, Kanellos P, Makrilakis K, et al. The effect of consumption of low-glycemic-index and low-glycemic-load desserts on anthropometric parameters and inflammatory markers in patients with type 2 diabetes mellitus. *Eur J Nutr.* 2015;54(7):1173-80. doi:10.1007/s00394-014-0795-8
2. Balfego M, Canivell S, Hanzu FA, et al. Effects of sardine-enriched diet on metabolic control, inflammation and gut microbiota in drug-naive patients with type 2 diabetes: a pilot randomized trial. *Lipids Health Dis.* 2016;15:78. doi:10.1186/s12944-016-0245-0
3. Fuller NR, Caterson ID, Sainsbury A, et al. The effect of a high-egg diet on cardiovascular risk factors in people with type 2 diabetes: the Diabetes and Egg (DIABEGG) study-a 3-mo randomized controlled trial. *Am J Clin Nutr.* 2015;101(4):705-13. doi:10.3945/ajcn.114.096925
4. Heilbronn LK, Noakes M, Clifton PM. The effect of high- and low-glycemic index energy restricted diets on plasma lipid and glucose profiles in type 2 diabetic subjects with varying glycemic control. *J Am Coll Nutr.* 2002;21(2):120-7.
5. Barnard ND, Cohen J, Jenkins DJ, et al. A low-fat vegan diet improves glycemic control and cardiovascular risk factors in a randomized clinical trial in individuals with type 2 diabetes. *Diabetes Care.* 2006;29(8):1777-83. doi:10.2337/dc06-0606
6. Brekke HK, Jansson PA, Lenner RA. Long-term (1- and 2-year) effects of lifestyle intervention in type 2 diabetes relatives. *Diabetes research and clinical practice.* 2005;70(3):225-34. doi:10.1016/j.diabres.2005.03.027
7. Brinkworth GD, Luscombe-Marsh ND, Thompson CH, et al. Long-term effects of very low-carbohydrate and high-carbohydrate weight-loss diets on psychological health in obese adults with type 2 diabetes: randomized controlled trial. *Journal of internal medicine.* 2016;280(4):388-97. doi:10.1111/joim.12501
8. Cohen AE, Johnston CS. Almond ingestion at mealtime reduces postprandial glycemia and chronic ingestion reduces hemoglobin A(1c) in individuals with well-controlled type 2 diabetes mellitus. *Metabolism.* 2011;60(9):1312-7. doi:10.1016/j.metabol.2011.01.017
9. Ferdowsian HR, Barnard ND, Hoover VJ, et al. A multicomponent intervention reduces body weight and cardiovascular risk at a GEICO corporate site. *American journal of health promotion : AJHP.* 2010;24(6):384-7. doi:10.4278/ajhp.081027-QUAN-255
10. Garg A, Bantle JP, Henry RR, et al. Effects of varying carbohydrate content of diet in patients with non-insulin-dependent diabetes mellitus. *Jama.* 1994;271(18):1421-8.
11. Gutierrez M, Akhavan M, Jovanovic L, Peterson CM. Utility of a short-term 25% carbohydrate diet on improving glycemic control in type 2 diabetes mellitus. *J Am Coll Nutr.* 1998;17(6):595-600.
12. Haimoto H, Iwata M, Wakai K, Umegaki H. Long-term effects of a diet loosely restricting carbohydrates on HbA1c levels, BMI and tapering of sulfonylureas in type 2 diabetes: a 2-year follow-up study. *Diabetes research and clinical practice.* 2008;79(2):350-6. doi:10.1016/j.diabres.2007.09.009
13. Hussain TA, Mathew TC, Dashti AA, Asfar S, Al-Zaid N, Dashti HM. Effect of low-calorie versus low-carbohydrate ketogenic diet in type 2 diabetes. *Nutrition (Burbank, Los Angeles County, Calif.).* 2012;28(10):1016-21. doi:10.1016/j.nut.2012.01.016
14. Jenkins DJ, Kendall CW, Augustin LS, et al. Effect of wheat bran on glycemic control and risk factors for cardiovascular disease in type 2 diabetes. *Diabetes Care.* 2002;25(9):1522-8.
15. Kim HH, Kim YJ, Lee SY, et al. Interactive effects of an isocaloric high-protein diet and resistance exercise on body composition, ghrelin, and metabolic and hormonal parameters in untrained young men: A randomized clinical trial. *Journal of diabetes investigation.* 2014;5(2):242-7. doi:10.1111/jdi.12148
16. Lalor BC, Bhatnagar D, Winocour PH, et al. Placebo-controlled trial of the effects of guar gum and metformin on fasting blood glucose and serum lipids in obese, type 2 diabetic patients. *Diabetic medicine : a journal of the British Diabetic Association.* 1990;7(3):242-5.
17. Mayer SB, Jeffreys AS, Olsen MK, McDuffie JR, Feinglos MN, Yancy WS, Jr. Two diets with different haemoglobin A1c and antiglycaemic medication effects despite similar weight loss in type 2 diabetes. *Diabetes Obes Metab.* 2014;16(1):90-3. doi:10.1111/dom.12191

## Electronic Supplementary Material

18. Li SC, Liu YH, Liu JF, Chang WH, Chen CM, Chen CY. Almond consumption improved glycemic control and lipid profiles in patients with type 2 diabetes mellitus. *Metabolism*. 2011;60(4):474-9. doi:10.1016/j.metabol.2010.04.009
19. Ma Y, Njike VY, Millet J, et al. Effects of walnut consumption on endothelial function in type 2 diabetic subjects: a randomized controlled crossover trial. *Diabetes Care*. 2010;33(2):227-32. doi:10.2337/dc09-1156
20. Nielsen JV, Jonsson E, Nilsson AK. Lasting improvement of hyperglycaemia and bodyweight: low-carbohydrate diet in type 2 diabetes. A brief report. *Uppsala journal of medical sciences*. 2005;110(2):179-83.
21. Paisey RB, Frost J, Harvey P, et al. Five year results of a prospective very low calorie diet or conventional weight loss programme in type 2 diabetes. *Journal of human nutrition and dietetics : the official journal of the British Dietetic Association*. 2002;15(2):121-7.
22. Pittas AG, Roberts SB, Das SK, et al. The effects of the dietary glycemic load on type 2 diabetes risk factors during weight loss. *Obesity (Silver Spring, Md.)*. 2006;14(12):2200-9. doi:10.1038/oby.2006.258
23. Tapsell LC, Gillen LJ, Patch CS, et al. Including walnuts in a low-fat/modified-fat diet improves HDL cholesterol-to-total cholesterol ratios in patients with type 2 diabetes. *Diabetes Care*. 2004;27(12):2777-83.
24. Tapsell LC, Batterham MJ, Teuss G, et al. Long-term effects of increased dietary polyunsaturated fat from walnuts on metabolic parameters in type II diabetes. *Eur J Clin Nutr*. 2009;63(8):1008-15. doi:10.1038/ejcn.2009.19
25. Tay J, Luscombe-Marsh ND, Thompson CH, et al. A very low-carbohydrate, low-saturated fat diet for type 2 diabetes management: a randomized trial. *Diabetes Care*. 2014;37(11):2909-18. doi:10.2337/dc14-0845
26. Toobert DJ, Glasgow RE, Strycker LA, Barrera M, Jr., Ritzwoller DP, Weidner G. Long-term effects of the Mediterranean lifestyle program: a randomized clinical trial for postmenopausal women with type 2 diabetes. *The international journal of behavioral nutrition and physical activity*. 2007;4:1. doi:10.1186/1479-5868-4-1
27. Uusitupa M, Siitonen O, Savolainen K, Silvasti M, Penttila I, Parviainen M. Metabolic and nutritional effects of long-term use of guar gum in the treatment of noninsulin-dependent diabetes of poor metabolic control. *Am J Clin Nutr*. 1989;49(2):345-51.
28. Wien M, Oda K, Sabate J. A randomized controlled trial to evaluate the effect of incorporating peanuts into an American Diabetes Association meal plan on the nutrient profile of the total diet and cardiometabolic parameters of adults with type 2 diabetes. *Nutr J*. 2014;13:10. doi:10.1186/1475-2891-13-10
29. Wing RR, Marcus MD, Salata R, Epstein LH, Miaskiewicz S, Blair EH. Effects of a very-low-calorie diet on long-term glycemic control in obese type 2 diabetic subjects. *Arch Intern Med*. 1991;151(7):1334-40.
30. Wing RR, Blair E, Marcus M, Epstein LH, Harvey J. Year-long weight loss treatment for obese patients with type II diabetes: does including an intermittent very-low-calorie diet improve outcome? *Am J Med*. 1994;97(4):354-62.
31. Wycherley TP, Thompson CH, Buckley JD, et al. Long-term effects of weight loss with a very-low carbohydrate, low saturated fat diet on flow mediated dilatation in patients with type 2 diabetes: A randomised controlled trial. *Atherosclerosis*. 2016;252:28-31. doi:10.1016/j.atherosclerosis.2016.07.908
32. Yancy WS, Jr., Foy M, Chalecki AM, Vernon MC, Westman EC. A low-carbohydrate, ketogenic diet to treat type 2 diabetes. *Nutrition & metabolism*. 2005;2:34. doi:10.1186/1743-7075-2-34
33. Pearce KL, Clifton PM, Noakes M. Egg consumption as part of an energy-restricted high-protein diet improves blood lipid and blood glucose profiles in individuals with type 2 diabetes. *Br J Nutr*. 2011;105(4):584-92. doi:10.1017/s0007114510003983
34. Parham M, Heidari S, Khorramirad A, et al. Effects of pistachio nut supplementation on blood glucose in patients with type 2 diabetes: a randomized crossover trial. *The review of diabetic studies : RDS*. 2014;11(2):190-6. doi:10.1900/rds.2014.11.190
35. Hakala P, Karvetti RL. Weight reduction on lactovegetarian and mixed diets. Changes in weight, nutrient intake, skinfold thicknesses and blood pressure. *Eur J Clin Nutr*. 1989;43(6):421-30.

## Electronic Supplementary Material

36. Fontes-Villalba M, Lindeberg S, Granfeldt Y, et al. Palaeolithic diet decreases fasting plasma leptin concentrations more than a diabetes diet in patients with type 2 diabetes: a randomised cross-over trial. *Cardiovascular diabetology*. 2016;15:80. doi:10.1186/s12933-016-0398-1
37. Frost G, Wilding J, Beecham J. Dietary advice based on the glycaemic index improves dietary profile and metabolic control in type 2 diabetic patients. *Diabetic medicine : a journal of the British Diabetic Association*. 1994;11(4):397-401.
38. Mancini JG, Filion KB, Atallah R, Eisenberg MJ. Systematic Review of the Mediterranean Diet for Long-Term Weight Loss. *Am J Med*. 2016;129(4):407-15.e4. doi:10.1016/j.amjmed.2015.11.028
39. Ajala O, English P, Pinkney J. Systematic review and meta-analysis of different dietary approaches to the management of type 2 diabetes. *Am J Clin Nutr*. 2013;97(3):505-16. doi:10.3945/ajcn.112.042457
40. Carter P, Achana F, Troughton J, Gray LJ, Khunti K, Davies MJ. A Mediterranean diet improves HbA1c but not fasting blood glucose compared to alternative dietary strategies: a network meta-analysis. *Journal of human nutrition and dietetics : the official journal of the British Dietetic Association*. 2014;27(3):280-97. doi:10.1111/jhn.12138
41. Brand-Miller J, Hayne S, Petocz P, Colagiuri S. Low-glycemic index diets in the management of diabetes: a meta-analysis of randomized controlled trials. *Diabetes Care*. 2003;26(8):2261-7.
42. Chen L, Pei JH, Kuang J, et al. Effect of lifestyle intervention in patients with type 2 diabetes: a meta-analysis. *Metabolism*. 2015;64(2):338-47. doi:10.1016/j.metabol.2014.10.018
43. Emadian A, Andrews RC, England CY, Wallace V, Thompson JL. The effect of macronutrients on glycaemic control: a systematic review of dietary randomised controlled trials in overweight and obese adults with type 2 diabetes in which there was no difference in weight loss between treatment groups. *Br J Nutr*. 2015;114(10):1656-66. doi:10.1017/s0007114515003475
44. Feinman RD, Pogozelski WK, Astrup A, et al. Dietary carbohydrate restriction as the first approach in diabetes management: critical review and evidence base. *Nutrition (Burbank, Los Angeles County, Calif.)*. 2015;31(1):1-13. doi:10.1016/j.nut.2014.06.011
45. Franz MJ, Boucher JL, Rutten-Ramos S, VanWormer JJ. Lifestyle weight-loss intervention outcomes in overweight and obese adults with type 2 diabetes: a systematic review and meta-analysis of randomized clinical trials. *J Acad Nutr Diet*. 2015;115(9):1447-63. doi:10.1016/j.jand.2015.02.031
46. Garg A. High-monounsaturated-fat diets for patients with diabetes mellitus: a meta-analysis. *Am J Clin Nutr*. 1998;67(3 Suppl):577s-82s.
47. Huang XL, Pan JH, Chen D, Chen J, Chen F, Hu TT. Efficacy of lifestyle interventions in patients with type 2 diabetes: A systematic review and meta-analysis. *European journal of internal medicine*. 2016;27:37-47. doi:10.1016/j.ejim.2015.11.016
48. Huo R, Du T, Xu Y, et al. Effects of Mediterranean-style diet on glycemic control, weight loss and cardiovascular risk factors among type 2 diabetes individuals: a meta-analysis. *Eur J Clin Nutr*. 2015;69(11):1200-8. doi:10.1038/ejcn.2014.243
49. Dong JY, Zhang ZL, Wang PY, Qin LQ. Effects of high-protein diets on body weight, glycaemic control, blood lipids and blood pressure in type 2 diabetes: meta-analysis of randomised controlled trials. *Br J Nutr*. 2013;110(5):781-9. doi:10.1017/s0007114513002055
50. Kirk JK, Graves DE, Craven TE, Lipkin EW, Austin M, Margolis KL. Restricted-carbohydrate diets in patients with type 2 diabetes: a meta-analysis. *J Am Diet Assoc*. 2008;108(1):91-100. doi:10.1016/j.jada.2007.10.003
51. Post RE, Mainous AG, 3rd, King DE, Simpson KN. Dietary fiber for the treatment of type 2 diabetes mellitus: a meta-analysis. *Journal of the American Board of Family Medicine : JABFM*. 2012;25(1):16-23. doi:10.3122/jabfm.2012.01.110148
52. Schellenberg ES, Dryden DM, Vandermeer B, Ha C, Korownyk C. Lifestyle interventions for patients with and at risk for type 2 diabetes: a systematic review and meta-analysis. *Ann Intern Med*. 2013;159(8):543-51. doi:10.7326/0003-4819-159-8-201310150-00007
53. Schwingshackl L, Hoffmann G. Comparison of the long-term effects of high-fat v. low-fat diet consumption on cardiometabolic risk factors in subjects with abnormal glucose metabolism: a systematic review and meta-analysis. *Br J Nutr*. 2014;111(12):2047-58. doi:10.1017/s0007114514000464

## Electronic Supplementary Material

54. Schwingshackl L, Hoffmann G. Mediterranean dietary pattern, inflammation and endothelial function: a systematic review and meta-analysis of intervention trials. *Nutr Metab Cardiovasc Dis.* 2014;24(9):929-39. doi:10.1016/j.numecd.2014.03.003
55. Shirani F, Salehi-Abargouei A, Azadbakht L. Effects of Dietary Approaches to Stop Hypertension (DASH) diet on some risk for developing type 2 diabetes: a systematic review and meta-analysis on controlled clinical trials. *Nutrition (Burbank, Los Angeles County, Calif.).* 2013;29(7-8):939-47. doi:10.1016/j.nut.2012.12.021
56. Terranova CO, Brakenridge CL, Lawler SP, Eakin EG, Reeves MM. Effectiveness of lifestyle-based weight loss interventions for adults with type 2 diabetes: a systematic review and meta-analysis. *Diabetes Obes Metab.* 2015;17(4):371-8. doi:10.1111/dom.12430
57. Tobias DK, Chen M, Manson JE, Ludwig DS, Willett W, Hu FB. Effect of low-fat diet interventions versus other diet interventions on long-term weight change in adults: a systematic review and meta-analysis. *Lancet Diabetes Endocrinol.* 2015;3(12):968-79. doi:10.1016/s2213-8587(15)00367-8
58. Vigiliouk E, Kendall CW, Blanco Mejia S, et al. Effect of tree nuts on glycemic control in diabetes: a systematic review and meta-analysis of randomized controlled dietary trials. *PLoS One.* 2014;9(7):e103376. doi:10.1371/journal.pone.0103376
59. Yokoyama Y, Barnard ND, Levin SM, Watanabe M. Vegetarian diets and glycemic control in diabetes: a systematic review and meta-analysis. *Cardiovascular diagnosis and therapy.* 2014;4(5):373-82. doi:10.3978/j.issn.2223-3652.2014.10.04
